1        **A Scube2-Shh feedback loop links morphogen release to morphogen**  
2        **signaling to enable scale invariant patterning of the ventral neural tube**

3        **Authors:** Zachary M. Collins<sup>1</sup>, Kana Ishimatsu<sup>1</sup>, Tony Y.C. Tsai<sup>1</sup>, and Sean G. Megason<sup>1,\*</sup>  
4

5        <sup>1</sup> Department of Systems Biology, Harvard Medical School, Boston, MA 02115, USA.

6        \*Author for correspondence (megason@hms.harvard.edu)

7

8        **Running Title:** Scaling of Shh patterning by Scube2

9

10       **Key words:** Scaling, morphogen, patterning, sonic hedgehog, robustness, size

11

12       **Summary Statement:** The Shh morphogen gradient can scale to different size tissues by feedback  
13       between Scube2 mediated release of Shh and Shh based inhibition of Scube2 expression

14

15       **Author contributions**

16                Z.M.C. conducted experiments and data analysis. Z.M.C and S.G.M. conceived the study,  
17       designed the experiments, and wrote the paper. K.I and Z.M.C. developed the size reduction technique.  
18       T.Y.C.T helped develop the image analysis technique and generated the *tg(shha:memCherry)* reporter  
19       line. S.G.M. supervised the overall study.

## 20 **Abstract**

21 To enable robust patterning, morphogen systems should be resistant to variations in gene expression  
22 and tissue size. Here we explore how a Shh morphogen gradient in the ventral neural tube enables  
23 proportional patterning in embryos of varying sizes. Using a surgical technique to reduce the size of  
24 zebrafish embryos and quantitative confocal microscopy, we find that patterning of neural progenitors  
25 remains proportional after size reduction. Intriguingly, a protein necessary for Shh release, *Scube2*, is  
26 expressed far from the source of sonic hedgehog production. *scube2* expression levels control Shh  
27 signaling extent during ventral neural patterning and conversely Shh signaling represses the expression  
28 of *scube2*, thereby restricting its own signaling. *scube2* is disproportionately downregulated in size-  
29 reduced embryos, providing a potential mechanism for size-dependent regulation of Shh. This  
30 regulatory feedback is necessary for pattern scaling, as demonstrated by a loss of scaling in *scube2*  
31 overexpressing embryos. In a manner akin to the expander-repressor model of morphogen scaling, we  
32 conclude that feedback between Shh signaling and *scube2* expression enables proportional patterning  
33 in the ventral neural tube by encoding a tissue size dependent morphogen signaling gradient.

34

## 35 **Introduction**

36 When Lewis Wolpert first posed the “French Flag Problem”, he was seeking the answer to this  
37 fundamental question: What systems enable proportional patterning in embryos independent of embryo  
38 size? By the time Wolpert formalized this problem, developmental biologists had long known that  
39 embryos scale their patterning programs in response to changes in embryo size (Wolpert, 1969). For  
40 example, sea urchin larva pattern normally from a single blastomere up to the four-cell stage and  
41 amphibian embryos can survive bisection and pattern proportionally at a reduced size (Driesch, 1892;  
42 Morgan, 1895; Spemann, 1938; Cooke, 1981). Significant scaling of pattern formation to tissue  
43 availability seems to be a near universal property of developing organisms. Yet, as we pass the 50-year

44 anniversary of Wolpert’s work, how morphogen gradients scale to pattern domains of varied sizes  
45 remains unclear in many systems.

46         Recent theoretical studies have proposed mechanisms that could account for scaling of  
47 morphogen-mediated patterning (Ben-Zvi and Barkai, 2010; Umulis and Othmer, 2013). Amongst the  
48 most prominent of these is a model termed expander-repressor integral feedback control (Ben-Zvi and  
49 Barkai, 2010). In this model, a morphogen represses the expression of another gene, known as the  
50 expander, that affects the range of the morphogen itself cell-non-autonomously. In such models,  
51 morphogen signaling will expand until it has reached an encoded equilibrium. This equilibrium is  
52 controlled by the morphogen’s repression of the expander, thus enabling “measurement” of the size of  
53 the domain in need of patterning. The first biological example of this mechanism was proposed in  
54 *Xenopus* axial patterning. In this original model, ADMP expands BMP signaling by binding Chordin and  
55 inhibiting shuttling of BMP towards the ventral side (Francois et al., 2009). However, more recent  
56 experimental work implicated another factor, Sizzled, which may play a central role in scaling in a  
57 mathematically equivalent manner (Ben-Zvi et al., 2014; Inomata et al., 2013). Expander-like  
58 relationships have also been proposed to regulate scaling of Dpp gradients during wing disc growth and  
59 even scaling of synthetic patterns in bacterial colonies (Ben-Zvi et al., 2011; Cao et al., 2016;  
60 Hamaratoglu et al., 2011).

61         Though scaling of early axis patterning following size reduction has been extensively studied,  
62 the molecular mechanisms through which tissues and organs subsequently scale their patterning has  
63 received less attention (Ben-Zvi et al., 2008; Inomata et al., 2013). Previously, scaling of patterning  
64 during organ growth has been considered in the fly wing disc, which grows remarkably in size while  
65 maintaining proportion (Averbukh et al., 2014; Ben-Zvi et al., 2011; Hamaratoglu et al., 2011). In  
66 vertebrates, the developing neural tube has been a powerful model to study morphogen-mediated  
67 patterning (Briscoe and Small, 2015). While neural tube patterning does not expand isometrically over

68 time with growth, embryos of different species maintain consistent embryonic proportions in the face of  
69 significant variation in organ size during initial patterning (Kicheva et al., 2014; Uygur et al., 2016).

70 The vertebrate ventral neural tube is patterned by the morphogen Sonic Hedgehog (Shh; Marti  
71 et al., 1995; Roelink et al., 1995). Shh is produced by the notochord and floorplate and induces ventral  
72 cell fates over a long range in a dose-dependent manner (Briscoe et al., 2001; Zeng et al., 2001). Shh  
73 ligands themselves are dually lipid-modified and are highly lipophilic (Pepinsky et al., 1998; Porter et al.,  
74 1996a; Porter et al., 1996b). While mechanisms of Shh transport have long been disputed, biochemical  
75 evidence supports soluble Shh as a primary component of long-range signaling, and release of Shh  
76 ligands from cell membranes is critical for gradient formation (Burke et al., 1999; Chen et al., 2004;  
77 Zeng et al., 2001). Shh release was largely thought to be achieved by the protein Dispatched, but  
78 recent work has identified Scube2 as a more potent factor in promoting Shh release (Burke et al., 1999;  
79 Creanga et al., 2012; Kawakami et al., 2002; Tukachinsky et al., 2012).

80 Scube2 is a Signal sequence containing protein with a CUB domain and EGF-like repeats. The  
81 role of Scube2 in Shh signaling was first identified from work using the zebrafish *you* mutant which  
82 corresponds to *scube2* (Hollway et al., 2006; Kawakami et al., 2005; van Eeden et al., 1996; Woods  
83 and Talbot, 2005; Yang et al., 2002). Interestingly, while *scube2* mutants have defects in ventral  
84 patterning, *scube2* is predominantly expressed in the dorsal and intermediate neural tube in both mice  
85 and zebrafish (Grimmond et al., 2001; Kawakami et al., 2005; Woods and Talbot, 2005). Additionally,  
86 epistasis experiments indicated that Scube2 acts upstream of Patched to stimulate Shh signaling  
87 (Woods and Talbot, 2005). This effect was also found to be cell-non-autonomous, as mosaic injection  
88 of *scube2* mRNA was capable of rescuing Shh-signaling defects over a long range (Hollway et al.,  
89 2006; Woods and Talbot, 2005). Studies in cell culture then demonstrated that Scube2 releases Shh  
90 from secreting cells cell-non-autonomously (Creanga et al., 2012; Tukachinsky et al., 2012). Recent  
91 work concluded that Scube2 may be responsible for catalyzing the shedding of lipids from the Shh  
92 ligands, but this model is disputed by previous findings that released Shh remains dually lipid-modified

93 (Creanga et al., 2012; Jakobs et al., 2014; Jakobs et al., 2016; Tukachinsky et al., 2012). Scube2's cell  
94 non-autonomous role in Shh release and unexpected expression pattern led us to wonder whether  
95 Scube2 may regulate pattern scaling by acting as an expander, as has recently been hypothesized  
96 elsewhere (Shilo and Barkai, 2017). In this work, we use quantitative imaging of cell fate specification in  
97 zebrafish to investigate the scaling of ventral neural patterning and the regulatory role of Scube2.

## 98 **Results**

### 99 **Ventral neural patterning scales with embryo size**

100 Studying mechanisms of scaling during growth or between species of different sizes is difficult  
101 because many properties of the patterning system depend on stage or species-specific variables. To  
102 study scaling of pattern formation in embryos with comparable genetic backgrounds at matched time  
103 points, we developed a technique to reduce the size of zebrafish embryos inspired by classical work in  
104 amphibians, as we recently described (Ishimatsu et al., 2018; Morgan, 1895; Spemann, 1938). Two  
105 lateral cuts are made across the blastula stage embryo: one to remove cells near the animal pole, to  
106 avoid damaging signaling centers crucial to early D-V patterning, and a second to remove yolk near the  
107 vegetal pole. (Fig. 1A). With this technique, a significant fraction of embryos pattern normally and  
108 develop at a reduced size (Fig. 1B-C).

109 We measured scaling of neural patterning in size-reduced embryos using quantitative imaging  
110 (Megason SG, 2009; Xiong et al., 2013). High-resolution image-stacks of 18-24 hours postfertilization  
111 (hpf) stage matched zebrafish embryos were collected under identical settings, during the same  
112 imaging session, from matched Anterior-Posterior positions in control and experimentally perturbed  
113 embryos (Fig. 1D-E). Imaging volumes were analyzed with custom built software to manually  
114 demarcate the dorsoventral axis and width of the neural tube along the length of the dataset (Fig. 1F,  
115 Fig. S1). Image intensity values were extracted in a set number of bins along the D-V axis for the left  
116 and right halves of the neural tube to normalize for variability in neural tube height. This system allowed

117 for the quantitative and unbiased comparison of 3-4 somite lengths of neural imaging data from multiple  
118 embryos.

119 Using this imaging platform, we compared the expression of *patched2*—a direct transcriptional  
120 target of Shh—with the *tg(patch2:kaede)* reporter in wild type and size-reduced embryos (Fig. 1G-J)  
121 (Huang et al., 2012) . When quantified relative to their respective neural tube dorsal-ventral heights,  
122 *tg(patch2:kaede)* response gradients maintained nearly identical intensity distributions despite neural  
123 tube height being 15.0% (+/- 2.8%) smaller in size-reduced embryos in this dataset (N=5), indicating  
124 that Shh responses scale following size reduction (Fig. 1I-J). When viewed on an absolute scale,  
125 control and size-reduced embryos show clear shifts in the response gradient as measured by the  
126 position at which 50% of mean control maximum intensity is reached ( $p=0.0076$ ) (Fig. 1J). To quantify  
127 this effect at the level of cell fate specification, we utilized a triple transgenic imaging strategy based on  
128 reporter lines marking *nkx2.2a* (p3 progenitors), *olig2* (pMN and some p3 progenitors), and *dbx1b* (p0,  
129 d6 progenitors) (Fig. 1K-L) (Gribble et al., 2007; Jessen et al., 1998; Kinkhabwala et al., 2011; Kucenas  
130 et al., 2008). Anterior-posterior averaged intensity profiles were then segmented to form cell fate  
131 profiles (see methods and Fig. S2). Using this method, we generated cell fate profiles which can be  
132 compared between embryos (Fig. S2). After normalizing for their altered D-V height (which was  
133 reduced in this population by 12.2% +/- 2.4% compared to controls), the average of these cell fate  
134 profiles of size-reduced embryos were virtually indistinguishable from those of full sized embryos (Fig.  
135 1M). Furthermore, differences between progenitor domain boundary positions were visible when size  
136 normalization was removed (Fig. 1N). Statistically significant shifts in the positions of the p2 and pMN  
137 upper boundaries were observed only when compared in their absolute coordinates (Fig. 1N). This  
138 further demonstrates that ventral neural patterning adjusts to changes in total D-V height.

139

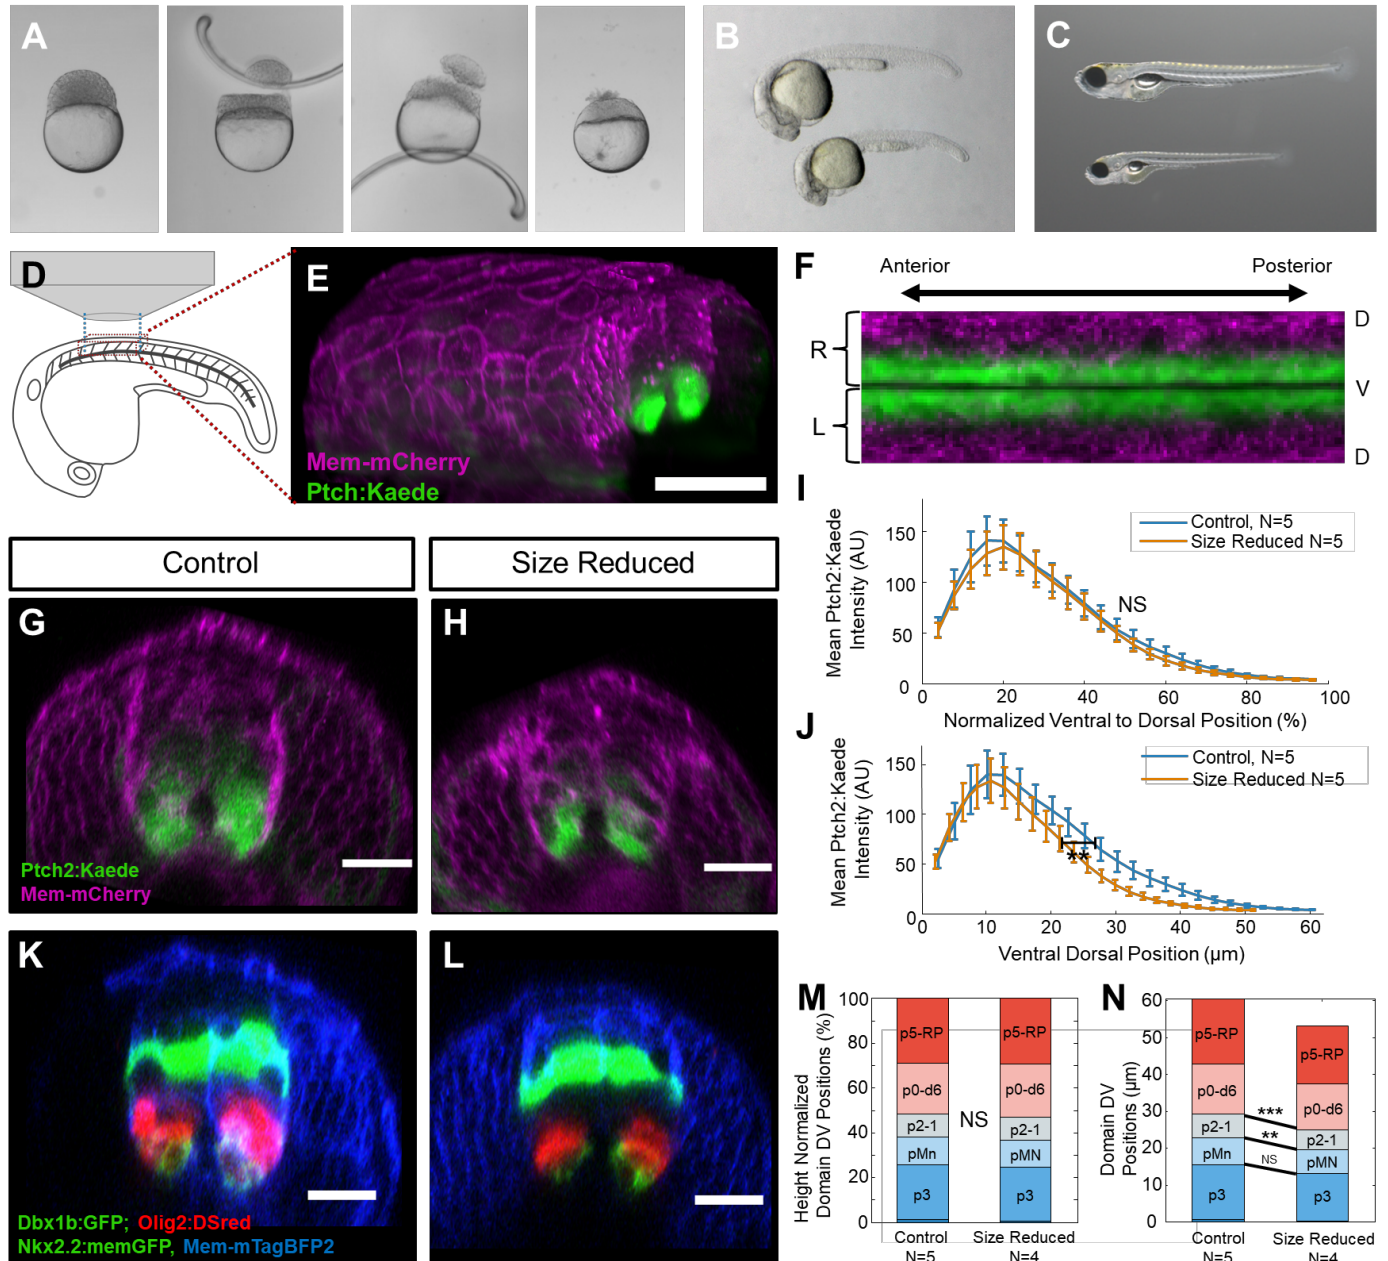

140

141 **Figure 1- Neural tube patterning scales following embryonic size reduction.**

142 (A) Surgical size reduction of 128-256 cell stage embryos in which cells and yolk are removed to  
 143 produce smaller embryos (images adapted from Ishimatsu et al. 2018). (B) Example of a size-reduced  
 144 embryo at 24 hpf (lower) with a normal-sized sibling (upper). (C) Example of a size-reduced larva at six  
 145 days post fertilization (lower) with a normal-sized sibling (upper). (D) Schematic of an embryo mounted

146 for imaging; anterior-posterior length of the imaging window is shown with blue lines. Red lines indicate  
147 the 3-D extent of the imaging window. (E) 3-D rendering of a confocal z-stack on an example  
148 *tg(ptch2:kaede) mem-mCherry* mRNA injected image volume. Scale bar represents 100  $\mu\text{m}$ . (F)  
149 Flattened “fillet” profile of segmented imaging data from a z-stack imaged as in E (See methods).  
150 (G,H,K,L) Scale bar represents 20  $\mu\text{m}$ . (G-H) Transverse view of 20 hpf *tg(ptch2:kaede)*, *mem-mCherry*  
151 mRNA injected control (G) and size-reduced embryos (H). Size reduction led to a decrease in DV  
152 height of 15.0% +/- 2.8% in this dataset. (I-J) *ptch2:kaede* intensity profiles from segmented imaging  
153 data of embryos from G-H plotted either normalizing for D-V neural tube height (I) or relative to their  
154 absolute neural tube heights (J). Error bars indicate standard deviation. No significant shift is observed  
155 in the position of 50% mean maximum control intensity on a relative scale between control and size-  
156 reduced embryos(I) (unpaired t-test  $p=0.5981$ ) while a very statistically significant shift in the position is  
157 observed when comparing absolute positional values (J) (unpaired t-test  $p=0.0076$ ; Control N=5, Size  
158 Reduced N=5). (K-L) Transverse views of *mem-mtagBFP2* mRNA injected 24 hpf *tg(nkx2:mGFP*;  
159 *olig2:dsred; dbx1b:GFP)* control (K) and size-reduced (L) embryos. Size reduced embryos had an  
160 average 12.2% +/- 2.4% reduction in neural tube DV height relative to control embryos in this dataset.  
161 (M-N) Results of progenitor domain segmentation analysis (See methods) of embryos treated as in K-L  
162 plotted either normalizing for differences in neural tube height (relative scale) (M) or with respect to their  
163 endogenous heights (absolute scale) (N). Only when compared on an absolute scale are statistically  
164 significant shifts seen in the dorsal boundaries of the p1-p2 and pMN domains (absolute heights  
165 unpaired t-test  $p^{\text{p2}}=1.0172\text{e-}4$  and  $p^{\text{pMN}}=0.0016$ , Control N=5, Size Reduced N=4). Thresholds for P  
166 value significance asterisks: Extremely significant: ( $< 0.0001$ ) = \*\*\*\*, (0.0001 to 0.001) = \*\*\*; Very  
167 significant: (0.001 to 0.01) = \*\*; Significant: (0.01 to 0.05) = \*.  
168



## 169 **Scube2 levels control Shh signaling**

170 Based on its role in the cell-non-autonomous regulation of Shh release and its dorsal expression  
171 pattern, we hypothesized a potential role for Scube2 in enabling scaling of Shh gradients. This  
172 hypothesis depends on *scube2* expression levels having a dose dependent effect on Shh signaling.  
173 However, previous work concluded that Scube2 is only required for Shh signaling as a permissive  
174 factor (Kawakami et al., 2005; Woods and Talbot, 2005). To examine the role of Scube2 in ventral  
175 neural patterning, we performed a morpholino knockdown of *scube2* in *tg(ptch2:kaede)* reporter  
176 embryos using a previously validated translation inhibiting morpholino (Fig. 2A-C) (Woods and Talbot,  
177 2005). We observed a decrease in Shh signaling following morpholino injection, as demonstrated by a  
178 statistically significant suppression of maximum *ptch2:kaede* intensity (Fig. 2C)(Woods and Talbot,  
179 2005)(Woods and Talbot, 2005)(Woods and Talbot, 2005)(Woods and  
180 Talbot, 2005). Additionally, quantification of *nkx2.2a*, *olig2*, and *dbx1b* domain sizes in embryos injected  
181 with *scube2* morpholino showed a contraction of ventral progenitor domains (Fig. 2D-F). Ventral shifts  
182 in the upper boundaries of the pMN and p3 domains were statistically significant, due in part to near  
183 complete elimination of the *nkx2.2a+* p3 domain (Fig. 2F). Unexpectedly, expansion of the p1-2 domain  
184 dorsally was also observed, potentially implying long range Shh signaling is required for complete p1-2  
185 induction.

186 Previous work concluded that Scube2 was a permissive factor based on a lack of ectopic  
187 expression of downstream Shh signaling markers as observed by whole mount *in situ* hybridization  
188 experiments (Woods and Talbot, 2005). However, our high-resolution quantitative imaging reveals that  
189 injection of *scube2* mRNA leads to the expansion of Shh signaling, as shown by broader distributions of  
190 *tg(ptch2:kaede)* fluorescence (Fig. 2G-I). Embryos injected with *scube2* mRNA showed significant  
191 dorsal shifts in the position of half control maximum *tg(ptch2:kaede)* intensities ( $p=0.0047$ ), a measure  
192 of absolute Shh signaling range (Fig. 2H). Maximum *tg(ptch2:kaede)* fluorescence in *scube2*  
193 overexpressing embryos was somewhat higher on average, but not statistically significant ( $p=0.0512$ ),

194 which may suggest the stronger effect of *scube2* overexpression is to extend the range of Shh  
195 signaling. In addition, *scube2* overexpression affected cell type patterning in the ventral neural tube, as  
196 measured in triple transgenic *nkx2.2a*, *olig2*, and *dbx1b* reporter embryos (Fig. 2J-L). Quantification of  
197 these cell fate profiles revealed large increases in p3 and pMN domain sizes, a decrease in the size of  
198 the p2-p1 domains, and unchanged patterning of the p0-d6 domains and more dorsal cell types.  
199 Ventralization was measured by comparing dorsal boundaries of the p3 and pMN, which were  
200 statistically significantly shifted (Fig. 2L). These data indicate that not only is Scube2 required for long  
201 range Shh signaling, but that *scube2* overexpression amplifies endogenous Shh signaling. Additionally,  
202 this suggests that Scube2-stimulated Shh release is a limiting factor in normal patterning.  
203

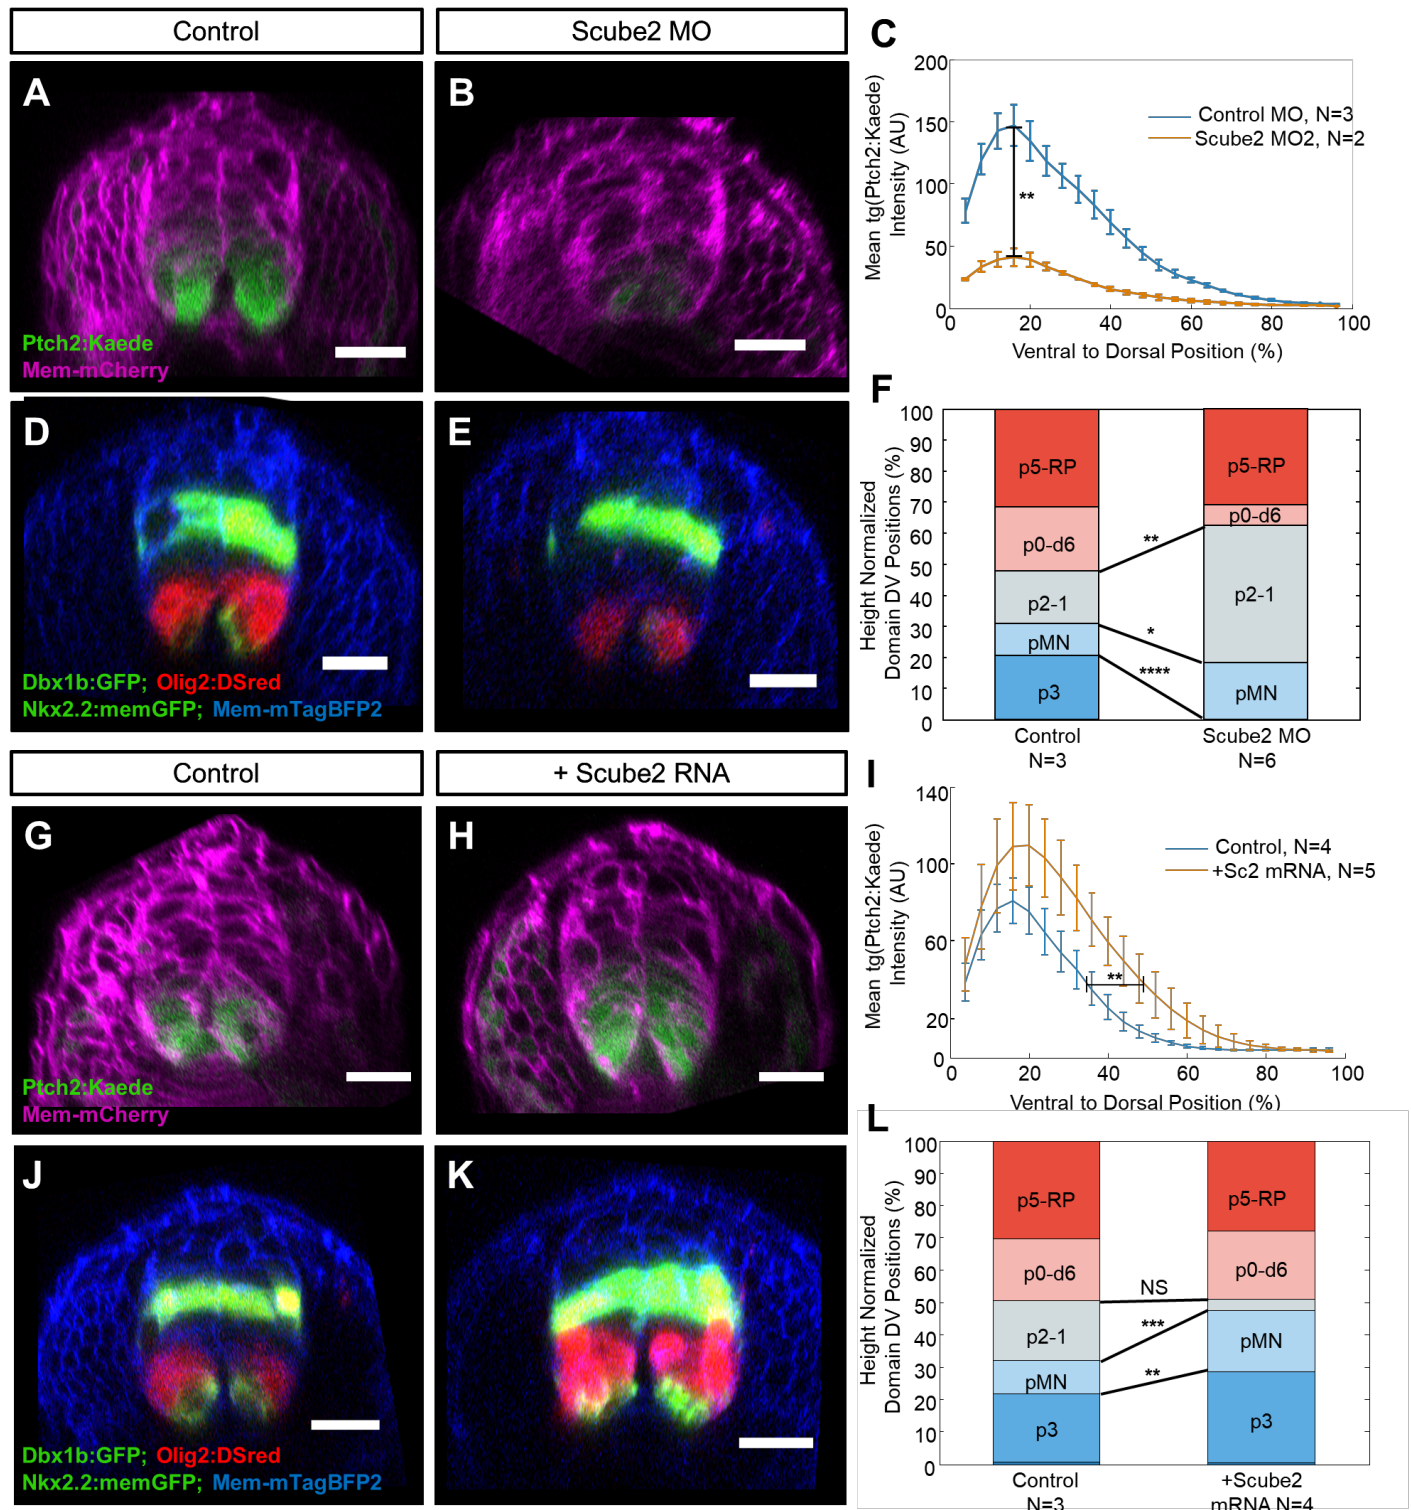

204

205

**Figure 2- Scube2 expression levels regulate Shh signaling in the ventral neural tube.**

206 (A-B,D-E, G-H, J-K) Transverse view of a confocal z-stack, scale bar represents 20  $\mu$ m (A-B)  
207 Representative image of 22 hpf *tg(ptch2:kaede)* reporter line embryos injected with (A) *mem-mCherry*  
208 mRNA with a control morpholino or (B) injected with *mem-mCherry* mRNA and *scube2* morpholino. (C)  
209 Quantification of mean intensity distributions in segmented neural tissue from z-stacks of embryos as  
210 treated in A-B. Maximum intensities of morpholino treated embryos were very statistically significantly  
211 reduced compared to controls ( $p=0.0040$ ). (D-E) Representative image of 20 hpf *tg(dbx1b:GFP,*  
212 *olig2:dsred, nkx2.2a:memGFP)* reporter line embryos injected with (D) *mem-mTagBFP2* mRNA alone  
213 or (E) co-injected with *scube2* morpholino. (F) Mean result of automated segmentation of progenitor  
214 domain sizes (see methods for details) for embryos treated as in D-E. Statistical comparisons of  
215 progenitor domain boundaries are shown with connected lines and significance is marked by asterisks.  
216 p1-2 domain upper boundaries were shifted dorsally following morpholino treatment ( $p^{p1-2}=0.0019$ ),  
217 while the upper boundary of pMN and p3 domains were both significantly contracted in morpholino  
218 injected embryos ( $p^{pMN}=0.0158$  and  $p^{p3}=9.87e-9$ ). (G-H) Representative image of 20 hpf  
219 *tg(ptch2:kaede)* reporter line embryos injected with (G) *mem-mcardinal* mRNA alone or (H) co-injected  
220 with *scube2* mRNA. (I) Quantification of mean intensity distributions of embryos as treated in G-H.  
221 Dorsoventral position at which half of average control maximum intensity was reached was very  
222 significantly shifted in *Scube2* overexpressing embryos (unpaired t-test  $p=0.00470$ ). (J-K)  
223 Representative image of 20 hpf *tg(dbx1b:GFP, olig2:dsred, nkx2.2:mGFP)* reporter line embryos  
224 injected with (J) *mem-mTagBFP2* mRNA alone or (K) co-injected with *scube2* mRNA. (L) Mean results  
225 of automated progenitor domain segmentation of J-K. Statistical comparisons of progenitor domain  
226 boundaries are shown with connected lines and significance marked by number of asterisks. pMN and  
227 p3 domains were drastically shifted dorsally in *scube2* mRNA injected embryos ( $p^{pMN}=8.6748e-04$ , and  
228  $p^{p3}=0.0034$  respectively).

## 229 **Shh negatively regulates Scube2 expression over a long-range**

230 To study Scube2's expression, we developed the *tg(scube2:moxNG)* reporter line containing  
231 7.6KB of the endogenous regulatory sequences driving the extremely bright moxNeonGreen  
232 fluorescent protein (Fig. 3A) (Costantini et al., 2015). The expression of *tg(scube2:moxNG)* we  
233 observed is consistent with previously reported *in situ* hybridizations (Grimmond et al., 2001; Kawakami  
234 et al., 2005; Woods and Talbot, 2005). *Tg(scube2:moxNG)* embryos showed very low expression close  
235 to the sources of Shh in the floor plate and notochord—as visualized with a transgenic *shh:memCherry*  
236 reporter line—and high levels of expression in the dorsal-intermediate neural tube (Fig. 3A-C). Time  
237 lapse imaging of *tg(scube2:moxNG)* embryos revealed weak mesodermal expression in the early  
238 embryo, which faded during the onset of neurulation and was replaced by high levels of expression in  
239 the dorsal and intermediate neural tube (Fig. 3D-G, Movie S1-2).

240 To test whether Scube2 is downregulated by Shh signaling, we injected mRNA encoding a  
241 potent activator of Shh signaling, dnPKA, at the single cell stage and observed the resulting embryos  
242 (Hammerschmidt et al., 1996). Embryos injected with *dnpka* mRNA showed near complete ablation of  
243 neural *tg(scube2:moxNG)* expression (Fig. 4 A-C). To test whether Shh ligands themselves were  
244 capable of suppressing Scube2 expression at a distance, we mosaically overexpressed *shha* in  
245 *tg(scube2:moxNG)* embryos by injecting a single blastomere at the 16-cell stage with either *mem-*  
246 *mTagBFP2* alone or with *shha* mRNA (Fig. 4 D-F). We expected local inhibition of Scube2 reporter  
247 activity near secreting cells within a few cell diameters. Surprisingly, *tg(scube2:moxNG)* expression was  
248 nearly completely eliminated in these embryos indicating potent cell-non-autonomous repression of  
249 Scube2 by Shh. When quantified, these embryos demonstrate a highly significant reduction of peak  
250 *tg(scube2:moxNG)* intensities (Fig. 4F). To test whether Shh's inhibition of Scube2 is required for its  
251 endogenous low ventral expression, we treated embryos with sonidegib, a potent Smoothed  
252 antagonist starting at the dome stage. Resulting embryos showed expanded *scube2* expression  
253 towards the floor plate and notochord (Fig. 4G-I). Shifts in ventral boundaries were quantified by

254 measuring the D-V position at which 50% of the maximum intensity of the control population was  
255 reached. These measurements were statistically significantly shifted in sonidegib-treated embryos  
256 relative to controls, indicating that endogenous Shh signaling is responsible for a lack of ventral *scube2*  
257 expression (Fig. 4I). A ventral expansion *tg(scube2:moxNG)* was also observed following Cyclopamine  
258 treatment, which is consistent with the previous findings of a genomewide screen for genes regulated  
259 by Shh signaling (Fig. S3) (Xu et al., 2006). To further probe the transcriptional regulation of Scube2's  
260 expression we performed a small scale CRISPR mutagenesis screen and found that Pax6a/b are  
261 necessary for driving Scube2 expression. Coinjection of pax6a and pax6b sgRNAs with Cas9 caused  
262 significant downregulation of *tg(scube2:moxNG)* relative to control embryos injected with a sgRNA  
263 targeting *tyrosinase*, an unrelated pigment gene (Fig. S4).

264

265 **Figure 3- Scube2 is expressed distantly from**  
266 **Shh secreting cells.**

267 (A) Schematic of the *scube2:moxNG* transgenic  
268 expression reporter construct used to generate the  
269 *tg(scube2:moxNG)* line. (B) Wide-field fluorescence  
270 image of *tg(scube2:moxNG)* embryo at 20 hpf. (C)  
271 Transverse view of *mem-mTagBFP2*-injected  
272 *tg(scube2:moxNG; shh:mem-mCherry)* embryo at 20  
273 hpf. Scale bar represents 20  $\mu$ m. (D-G) Transverse  
274 view from a time-lapse imaging dataset of  
275 *tg(scube2:moxNG; shh:memCherry)* embryo which  
276 was injected at the single cell stage with *mem-*  
277 *mTagBFP2* mRNA. Time in hours post fertilization is  
278 displayed in the bottom right corner. Scale bar  
279 represents 50  $\mu$ m. (D) At early neurulation stages  
280 there is weak mesodermal expression of  
281 *scube2:moxNG* in the notochord. In addition,  
282 expression of *scube2:moxNG* is visible in neural  
283 progenitors as the neural plate converges. (E) By  
284 12.5 hpf a pronounced gap in expression of neural  
285 progenitors between *shh:mem-mCherry* and  
286 *scube2:moxNG* cells is visible. (F) Expansion of the  
287 *scube2+* domain dorsally is visible as cells continue  
288 to converge. (G) *scube2* expression is constricted to  
289 the dorsal-intermediate neural tube.

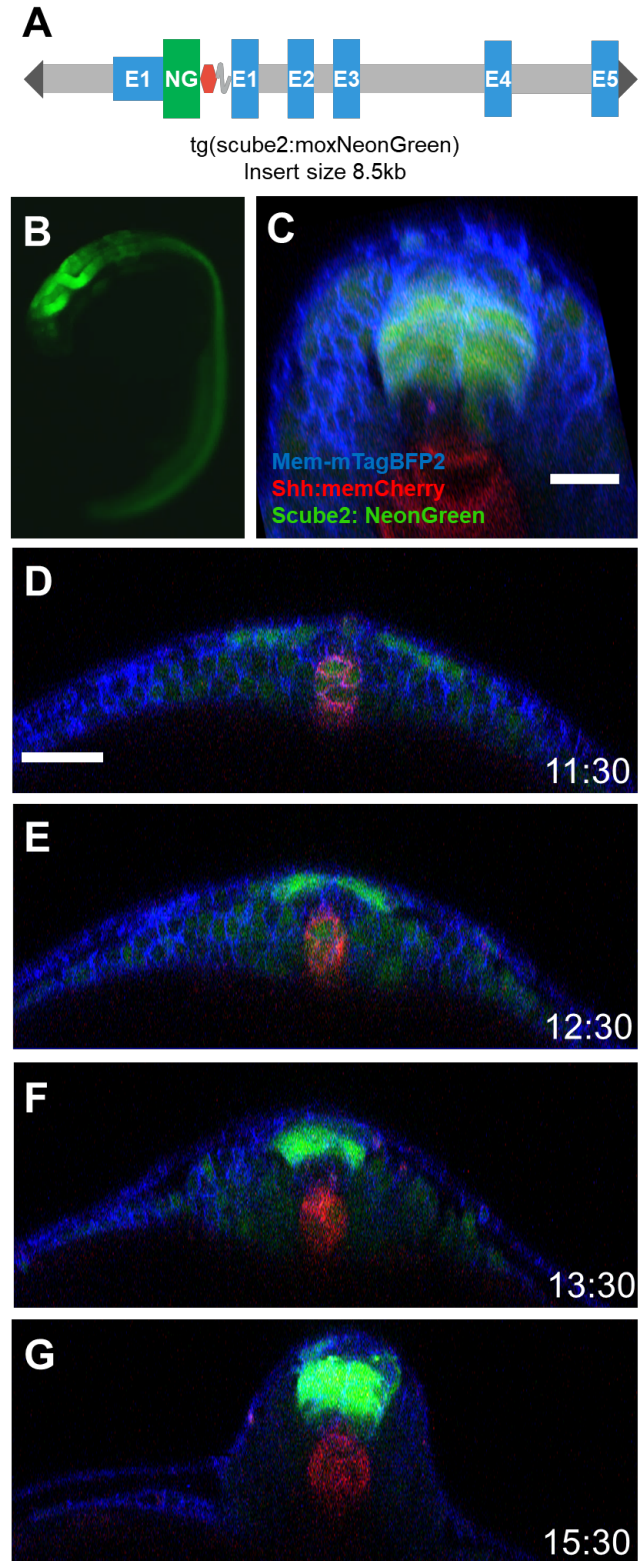

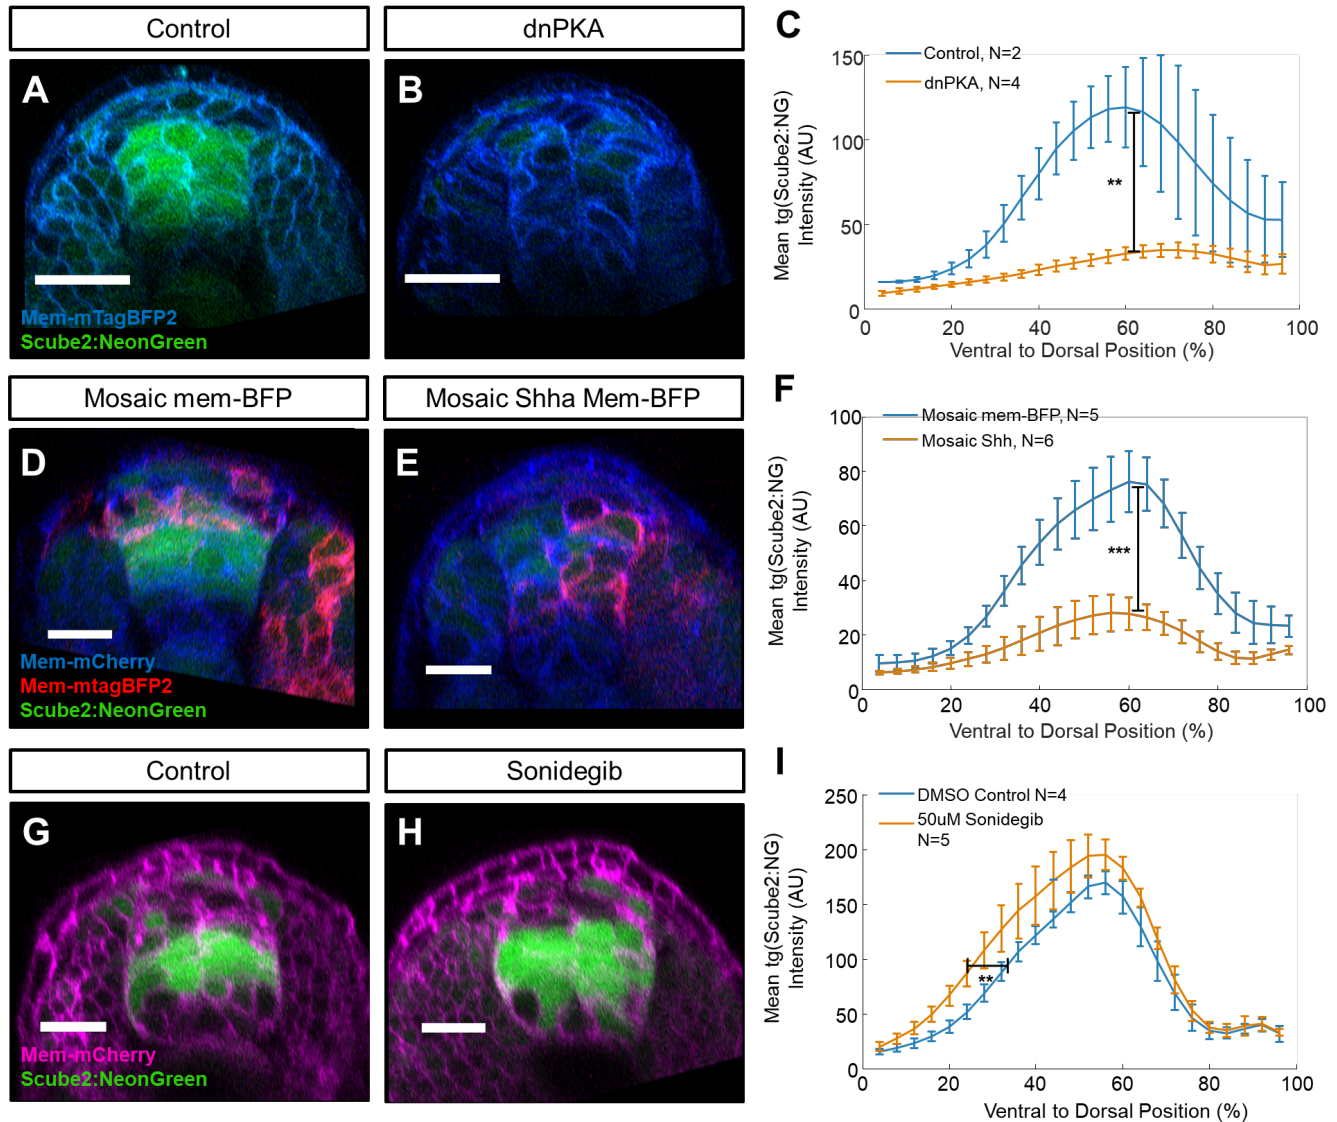

290

291 **Figure- 4 Shh signaling represses Scube2 expression.**

292 (A-B, D-E, G-H) Scale bar represents 20  $\mu$ m (A-B) Transverse view of 18 hpf *tg(scube2:moxNG)*

293 reporter line embryos injected with (A) *mem-mTagBFP2* mRNA alone or (B) co-injected with *dnPKA*

294 mRNA. (C) Quantification of mean reporter intensity of embryos as treated in A-B. Maximum

295 *scube2:moxNG* intensity values were very significantly reduced in *dnPKA* mRNA-injected embryos (p=

296 0.0014). (D-E) Transverse view 20 hpf *tg(scube2:moxNG)* reporter line embryos injected at the single

297 cell stage with *mem-mCherry* mRNA and then injected in one blastomere at the 8-16 cell stage with



298 either (D) *mem-mTagBFP2* mRNA alone or (E) co-injected with *shha* mRNA. (F) Quantification of mean  
299 reporter intensity of embryos as treated in D-E. Maximum *scube2:moxNG* reporter intensity is extremely  
300 significantly reduced in *shha* injected embryos ( $p= 9.14e-06$ ). (G-H) Transverse view 22 hpf  
301 *tg(scube2:moxNG; mem:mCherry)* embryos treated with a DMSO control (G) or treated with 50  $\mu$ m  
302 Sonidegib (H). (I) Quantification of mean reporter intensity of embryos as treated in G-H. The black  
303 bracket marks the position of 50% of control maximum intensity used for statistical testing. These  
304 values were very significantly shifted ventrally in drug treated embryos relative to control (unpaired t-  
305 test  $p=0.0014$ .).  
306

### 307 **Scube2 diffuses over long distances during patterning**

308 While Scube2 is known to act cell non-autonomously from transplantation experiments and  
309 Scube2-conditioned media has a potent Shh release stimulating effect *in vitro*, the localization of  
310 Scube2 protein during development is unknown (Woods and Talbot, 2005; Creanga et al., 2012). *In*  
311 *vitro*, Scube2 is thought to associate with Heparin Sulfate Proteoglycans, and Scube2 had been  
312 hypothesized to diffuse from secreting cells in the dorsal neural tube, the need for which was later  
313 disputed (Jakobs et al., 2016; Kawakami et al., 2005; Hollway et al., 2006). To examine Scube2's  
314 localization, we developed Scube2 fluorescent fusion proteins by tagging the C-terminus as previously  
315 validated in cell culture with other tags (Fig. 5A) (Creanga et al., 2012). The resulting Scube2-mCitrine  
316 fusion proteins were functional and rescued Scube2 CRISPR mutants at comparable rates to wildtype  
317 Scube2 (Fig. S5). Mosaic injection of *scube2-mCitrine* mRNA at the 32-64 cell stage revealed that  
318 Scube2-mCitrine diffuses distantly from producing cells (Fig. 5B). Following single cell mRNA injection,  
319 Scube2-mCitrine fusions were secreted and did not remain associated with cell membranes, as  
320 demonstrated by their presence in the extracellular space between cells marked with mem-mCherry  
321 (Fig. 4C).

322 To assay Scube2's rate of diffusion we performed Fluorescence Recovery After Photobleaching  
323 (FRAP) at the dome stage, during which cell movement is minimal. FRAP was performed in a 100 $\mu$ m x  
324 100 $\mu$ m region and recovery was observed at 10 second intervals over 5 minutes (Fig. 5 D-E, Movie S3-  
325 4). Image data from the bleached region was then normalized to its initial intensity and fitted to recovery  
326 curves using standard methods (Munjal et al., 2015). We find that the addition of Scube2 to mCitrine  
327 causes only minor changes to its diffusion (Fig. 5F-G). No significant differences were observed  
328 between the calculated mobile fractions of Scube2-mCitrine (0.283 +/- 0.018) and Sec-mCitrine  
329 (0.338 +/- 0.019; unpaired t-test p=0.0698). When the time to 50% recovery of the mobile fraction is  
330 calculated, Scube2-mCitrine has modestly slower diffusion time than Sec-mCitrine alone (Fig. 5 F-G;

331 p=0.0405). These data further support Scube2's diffusion in the extracellular space, which likely  
332 mediates its long range of effect.

333 To observe distributions of Scube2 during development, we generated a transgenic line  
334 expressing the full length Scube2 protein fused to moxNeonGreen under control of Scube2 regulatory  
335 sequences (Fig. 5H-K). We validated the functionality of this *Tg(scube2:scube2-moxNG)* line using a  
336 morpholino which bound only endogenous Scube2 at the splice junction of exon6, and not  
337 *Tg(scube2:scube2-moxNG)* derived RNA which lacks this splice junction (Figure S6).  
338 *Tg(scube2:scube2-moxNG)* embryos were markedly resistant to treatment with this morpholino,  
339 validating the in vivo functionality of this construct (Figure S6). *Tg(scube2:scube2-moxNG)* embryos  
340 showed broad distributions of Scube2 during patterning (Fig. 5H-K). Throughout early patterning  
341 Scube2-moxNeonGreen is visible near ventral cells marked by *tg(shha:mem-mCherry)*, although  
342 Scube2 is expressed largely in the dorsal neurectoderm at this timepoint (Fig. 5H-I, Movie S5-6). By 24  
343 hpf *tg(scube2:scube2-moxNG)* fluorescence is found distributed throughout the embryo, although  
344 expression from *tg(scube2:moxNG)* is localized to the dorsal-intermediate neurectoderm. These data  
345 further suggest that Scube2's long range of effect can be explained by diffusion from secreting cells in  
346 the intermediate and dorsal neural tube to the source of Shh in the floor plate and notochord.

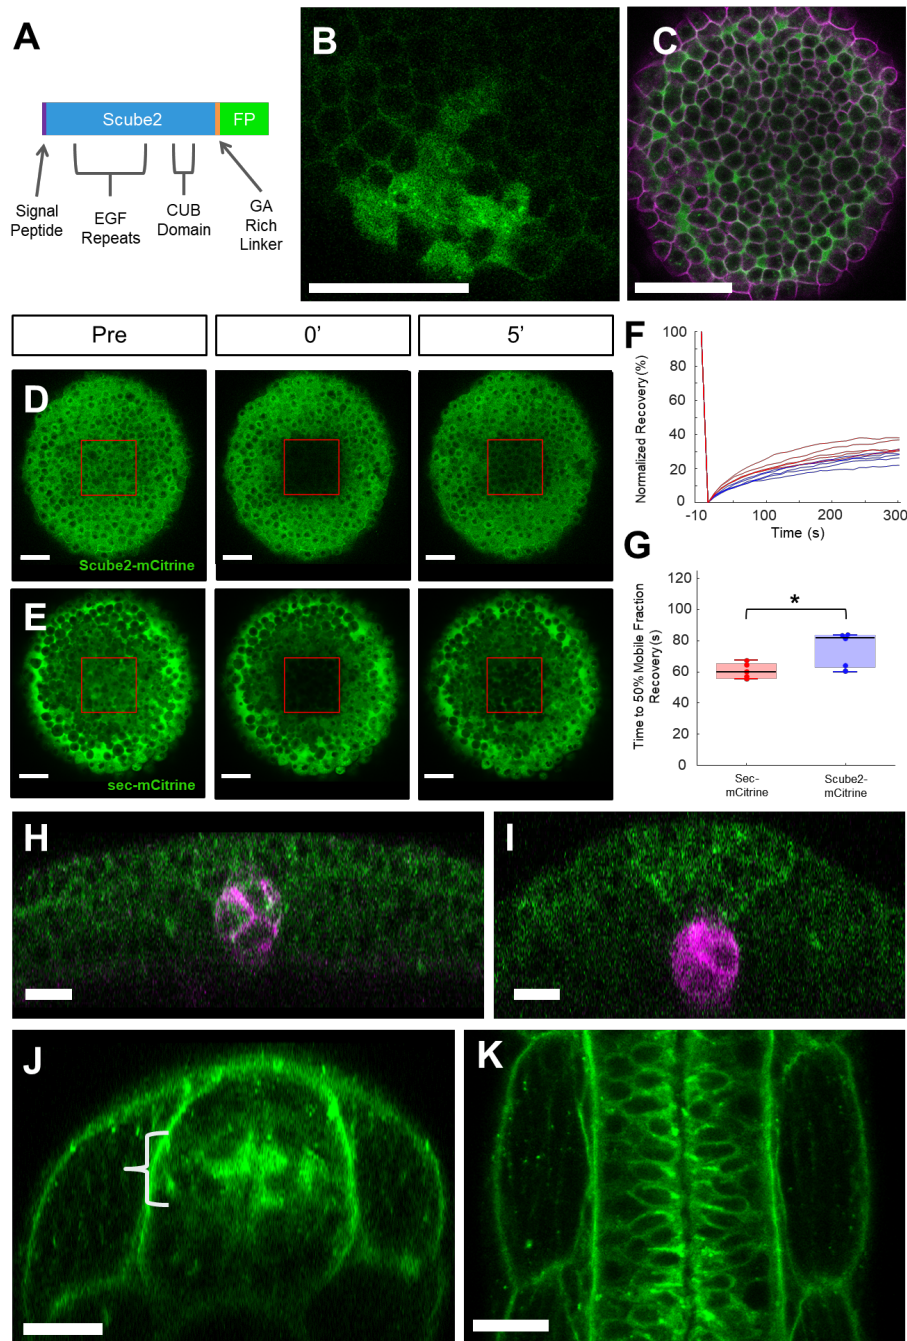

347

348 **Figure 5- Scube2 diffuses from secreting cells and is broadly distributed during**  
 349 **patterning.**

350 (A) Schematic of Scube2-mCitrine fluorescent fusion protein design. (B-C) Scale bar represents 100  
 351  $\mu\text{m}$ . (B) Scube2-mCitrine fluorescence at the sphere stage from embryos injected in one blastomere at  
 352 the 64-cell stage with *scube2-mCitrine* mRNA. Cells from the injected clone are marked by intracellular

353 (secretory system) fluorescence. (C) Scube2-mCitrine fluorescence from embryos injected at the single  
354 cell stage with *scube2-mCitrine* and *membrane mCherry* mRNA. (D-E) Fluorescence recovery after  
355 photobleaching at the dome stage of Scube2-mCitrine (D) and Secreted-mCitrine (E). (F) Raw FRAP  
356 recovery traces normalized to maximum intensity pre-bleach and minimum intensity following  
357 bleaching. Red lines represent Secreted-mCitrine and blue lines represent Scube2-mCitrine. (G) A  
358 boxplot comparing the time at which 50% recovery of mobile fraction is achieved from dome stage  
359 FRAP data. Bracket with asterisk denotes unpaired t-test comparison between Scube2-mCitrine and  
360 Sec-mCitrine ( $p = .0405$ ) (H-K) Scale bar represents 20  $\mu\text{m}$ . (H) Transverse view of an 11.5 hpf  
361 *tg(sc2:sc2-moxNG;shh:mem-mCherry)* embryo. (I) Transverse view of a 14 hpf *tg(sc2:sc2-moxNG;*  
362 *shh:mem-mCherry)* embryo. (G) Transverse view of a 24 hpf *tg(scube2:scube2-moxNG)* embryo. (K)  
363 Horizontal view of the embryo from J.  
364

## 365 **Feedback regulation of Scube2 levels is necessary for pattern scaling**

366 To examine the regulation of Scube2 in size-reduced embryos, we performed our size reduction  
367 technique on *tg(scube2:moxNG; shha:mem-mCherry)* embryos and imaged them at 20 hours post  
368 fertilization. Unlike other observed patterning genes, *scube2* expression levels did not scale in size-  
369 reduced embryos but were instead severely reduced (Fig. 6A-C). This finding is consistent with an  
370 expander-repressor-like model of Scube2-Shh. In this regime, inhibition of *scube2* expression in size-  
371 reduced embryos would contract Shh signaling, enabling adjustment of Shh signaling for a decreased  
372 tissue size (Fig. 6D-E).

373 Next, we examined whether feedback control of *scube2* expression levels by Shh signaling is  
374 required for pattern scaling by saturating *scube2* levels by over-expression. If Scube2 is responsible for  
375 adjusting Shh signaling during scaling, we would expect *scube2*-overexpressing size-reduced embryos  
376 to have the same absolute Shh response profiles as controls, which would fail to scale following size  
377 normalization (Fig. 6F-G). If scaling of ventral patterning is not dependent on Scube2, we would expect  
378 maintenance of pattern scaling with size-proportionate increases in *ptch2:kaede* distributions in both  
379 populations. We overexpressed *scube2* by mRNA injection in *ptch2:kaede* reporter embryos. When  
380 normalized for differences in D-V heights, size-reduced *scube2*-overexpressing embryos showed a  
381 disproportionate expansion of the Ptch signaling gradient compared to normal-sized *scube2*-  
382 overexpressing embryos (Fig. 6H-K). Dorsal expansion of Shh signaling is quantified using the position  
383 of 50% of average maximum control intensity, which is statistically significantly shifted dorsally in size-  
384 reduced embryos (Fig. 6J). Importantly, when *tg(ptch2:kaede)* response profiles are plotted on an  
385 absolute rather than relative scale, they nearly exactly overlap (Fig. 6K). This overlap without size  
386 normalization suggests that *scube2* overexpression encodes a response profile which is independent of  
387 embryo size and is not secondarily tuned by another scaling related factor. This strongly suggests that  
388 control of *scube2* expression levels is required for scaling the Shh response gradient.

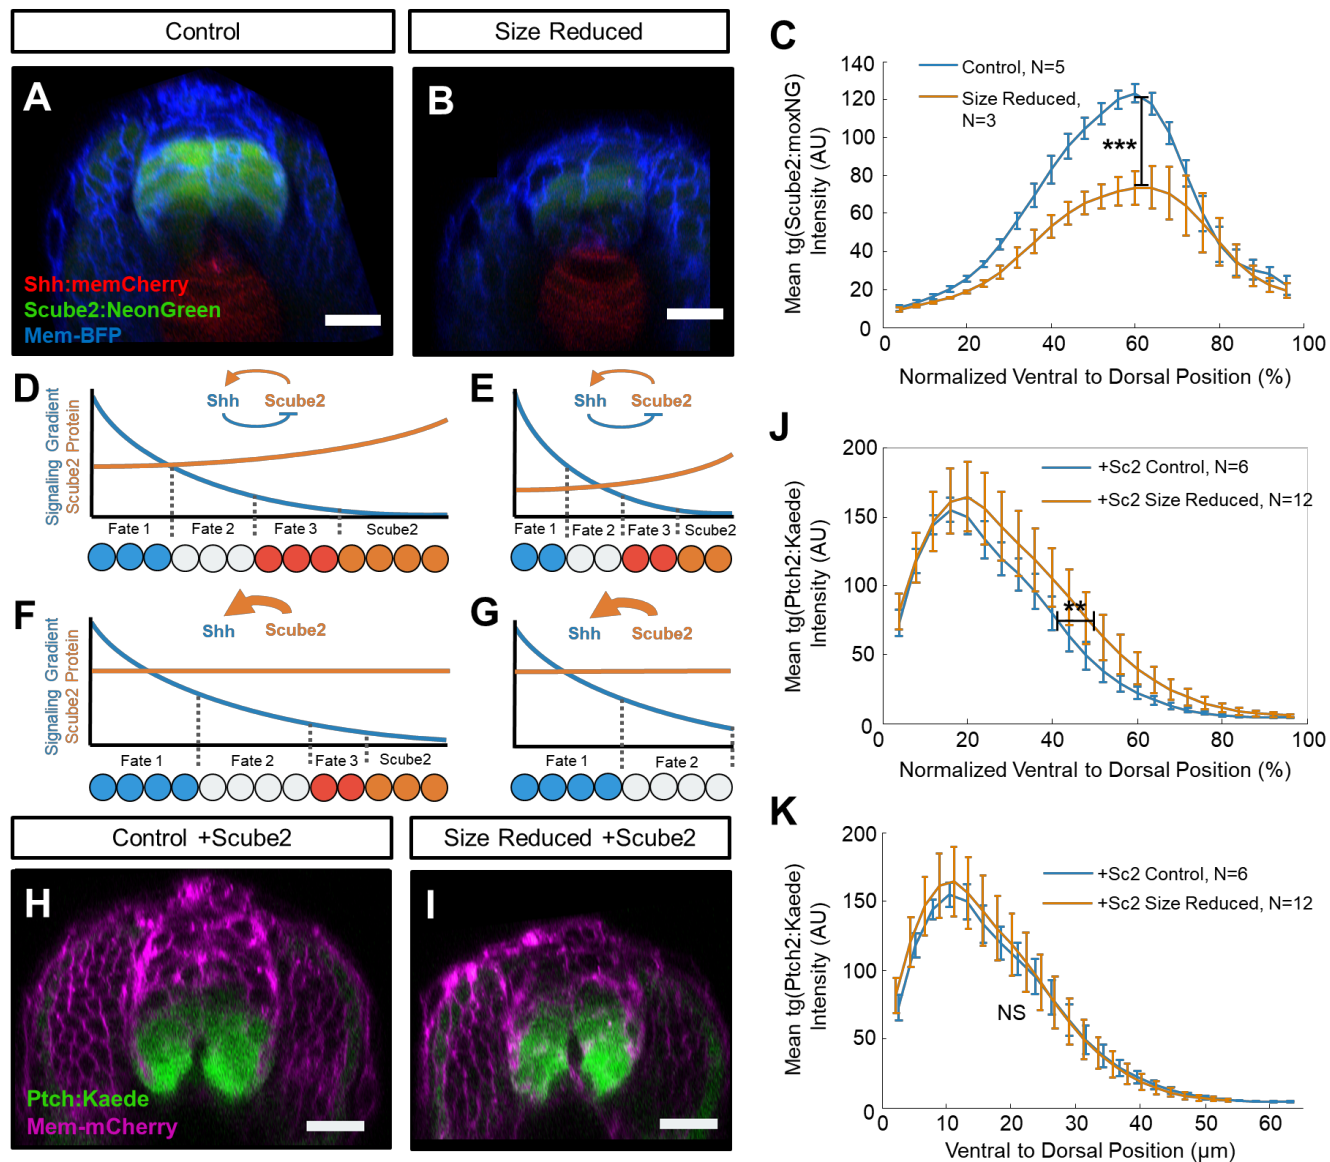

389

390 **Figure 6- Scube2 expression is size-dependent and required for pattern scaling.**

391 (A-B) Transverse view of *mem-mTagBFP2* mRNA-injected *tg(scube2:moxNG; shh:mem-mCherry)*

392 control (A) or size-reduced (height reduction of 17.1% +/- 7.7%) (B) embryos at 20 hpf. (C)

393 Quantification of mean *tg(scube2:moxNG)* intensity versus ventral-to-dorsal position of embryos from

394 A-B. Maximum intensity values are statistically significantly reduced in treated embryos ( $p=3.03e-4$ ). (D-

395 E) Schematic of expander-repressor-like feedback control of Shh signaling by Scube2 and its ability to

396 enable pattern scaling. Repression of Scube2 by Shh encodes an equilibrium level of Shh signaling

397 across the tissue by linking morphogen spread to tissue size. (F-G) Schematic representation of the  
398 experiment as performed in H-K, where *Scube2* levels are at saturation due to overexpression, and  
399 size-reduced embryos (G) are disproportionately affected. (H-I) Transverse view of 20 hpf  
400 *tg(ptch2:kaede)* control (H) and size-reduced (I) embryos injected with *mem-mCherry* and *scube2*  
401 mRNA. (J) Quantification of mean *tg(ptch2:kaede)* intensity versus normalized ventral-to-dorsal position  
402 of embryos treated as in H-I. Very significant shifts are observed in the dorsal position of 50% of the  
403 maximum intensity value (unpaired t-test  $p=0.0092$ ). (K) Intensity profiles from J rescaled to reflect the  
404 absolute scale of the measurements (DV height reduction of 15.2% +/- 2.1%). When measured in these  
405 coordinates, no difference is observed in the position of half of maximum intensity ( $p= 0.9760$ ).  
406



407 **Discussion**

408 Our work uncovers that the morphogen Sonic Hedgehog can self-regulate to enable scale-  
409 invariant patterning through linking morphogen signaling to inhibition of Scube2. We discovered that  
410 patterning of the neural tube adjusts to tissue availability following surgical size reduction in zebrafish  
411 embryos. Using overexpression experiments we demonstrate that Scube2's activity during patterning is  
412 not just permissive—overexpression of *scube2* quantitatively enhances Shh signaling (Woods and  
413 Talbot, 2005). Utilizing a transgenic reporter line which we developed, we characterized the expression  
414 of Scube2 during neural patterning and found that Shh signaling is responsible for its repression in the  
415 ventral neural tube. Using Scube2 fluorescent fusion proteins we found that Scube2 is broadly  
416 distributed from secreting cells, explaining its previously reported cell non-autonomous activity  
417 (Creanga et al., 2012; Woods and Talbot, 2005). Unlike other patterning genes, *scube2* responds to  
418 changes in neural tube height by disproportionately decreasing its expression, and overexpression of  
419 Scube2 inhibits scaling of the Shh signaling gradient by circumventing its feedback control. The  
420 expression of *scube2* thus can be seen as comparable to the “size-dependent factor” Sizzled, which is  
421 thought to enable scaling in early D-V patterning by tuning its expression levels to embryo size by  
422 chordin-dependent feedback inhibition (Inomata et al., 2013).

423 The relationship between Scube2 and Shh has important similarities to proposed “expander-  
424 repressor” models of morphogen scaling (Barkai and Ben-Zvi, 2009; Ben-Zvi and Barkai, 2010; Inomata  
425 et al., 2013). As with expanders in these models, *scube2* enhances morphogen range, is repressed by  
426 morphogen signaling, and acts cell non-autonomously at a distance from its source. However, Scube2's  
427 reported role in morphogen release may be distinct from the proposed mechanism of expanders.  
428 Expanders extend the range of morphogens by promoting their diffusion or inhibiting their degradation  
429 (Ben-Zvi and Barkai, 2010). While release of Shh ligands from secreting cells would support their  
430 transport, the potentially irreversible nature of this effect and local action at the morphogen source  
431 would make distinct predictions for Scube2's effects on morphogen distributions. Nonetheless our study

432 marks the first observation of an expander-repressor-like relationship outside of the BMP/Dpp signaling  
433 pathway in a developing organism. This finding raises the possibility that expander-repressor-like  
434 relationships may be common motifs in the regulation of morphogen gradients.

435         We began this work in part due to interest in the discrepancy between the area of Scube2's  
436 activity in the ventral neural tube and its expression in the dorsal neural tube. Our work with Scube2  
437 fluorescent protein fusions revealed that Scube2 is diffusive and is distributed broadly from producing  
438 cells. Scube2's diffusion from producing cells could easily account for the distance between its  
439 expression domain and area of effect (Figure 5). Scube2's broad distribution and considerable  
440 extracellular diffusivity bolsters the hypothesis that Scube2 may serve as a chaperone for Shh during its  
441 transport as hypothesized previously (Tukachinsky et al., 2012). Cell culture experiments have  
442 indicated that Scube2 cooperates with Dispatched in a cholesterol-dependent "hand off" by binding  
443 different domains on Shh's cholesterol moiety (Tukachinsky et al., 2012). Continued binding of Scube2  
444 to the hydrophobic sterol domain may facilitate the un-hindered diffusion of Shh through the  
445 extracellular milieu. This model is consistent with the dose dependency we observe in our Scube2  
446 overexpression experiments (Figure 2G-L) and may help solve the puzzle of the long-range transport of  
447 dually lipid modified hedgehog in vertebrates. Further investigation of the strength and duration of  
448 Scube2 and Shh's binding in vivo may shed light on this relationship. Unfortunately, direct imaging of  
449 this phenomenon is hampered by the lack of fully functional Shh fluorescent protein fusions  
450 (Chamberlain et al., 2008).

451         While some evidence suggests that Scube2 plays a role in lipid-shedding, these observations  
452 conflict with previous HPLC analysis and the findings of independent groups which demonstrated that  
453 Shh species released by Scube2 are dually lipid modified (Creanga et al., 2012; Tukachinsky et al.,  
454 2012). If correct, a model of Scube2 in which it acts only transiently at the cell surface of producing  
455 cells—either by enabling the formation of multimeric Shh complexes or lipid shedding—would have  
456 interesting implications for its role as an expander. Expanders are often formalized as having a dose

457 dependent reversible effect on morphogen spread, while a transient role of Scube2 in Shh multimeric  
458 complex formation or shedding would be localized and irreversible. Mathematical modeling may reveal  
459 interesting implications of each proposed mechanism in Scube2-Shh feedback interactions during  
460 pattern scaling.

461 Scube2 is one of several recently identified elements of the Shh signaling pathway that exerts  
462 cell non-autonomous effects. Recent work has shown that Hhip—initially characterized as a membrane-  
463 tethered hedgehog antagonist—acts over a long range that cannot be explained by ligand  
464 sequestration (Kwong et al., 2014). Additionally, the Hedgehog receptor, Patched, may also have cell  
465 non-autonomous inhibitory effects on Smoothed through regulating inhibitory sterols or sterol  
466 availability (Bidet et al., 2011; Roberts et al., 2016). Together with known feedback relationships and  
467 the diffusivity of Scube2 that we demonstrated here, these mechanisms interlink Shh signaling between  
468 neighboring cells and may enable tissue level properties, such as the scaling of pattern formation we  
469 observed.

470 However, scaling of neural patterning is unlikely to be achieved by regulation of Shh signaling  
471 alone. BMP signaling in the dorsal neural tube is known to pattern dorsal progenitors. Scaling of BMP  
472 signaling in dorsal neural patterning may be achieved via a similar or carry-over mechanism to early D-  
473 V axis patterning and should be explored in further studies. In the early D-V patterning system, both  
474 existing models propose expander-like relationships between elements of the BMP signaling pathway.  
475 The first model proposed ADMP as a scaling related factor, while more recent research has  
476 demonstrated that Sizzled has an indispensable role in scaling (Ben-Zvi et al., 2008; Ben-Zvi et al.,  
477 2014; Inomata et al., 2013). During neural patterning, the BMP antagonists Noggin, Follistatin, and  
478 Chordin are expressed in the notochord while BMP ligands are expressed in the roof plate. Intriguingly,  
479 while Sizzled does not seem to be expressed during neural patterning, ADMP is expressed in the  
480 notochord and thus may play a role in the scaling of BMP-mediated patterning of the dorsal neural tube  
481 (Willot et al., 2002).

482 BMP signaling is known to increase the thresholds for Shh-dependent cell fate specification,  
483 making signaling integration between these pathways a potential additional candidate regulator of  
484 scaling (Liem et al., 2000; McHale et al., 2006). Inhibition of either Shh or BMP signaling causes  
485 expansion of signaling by the alternative program. In normal patterning, cells do not measure ratios of  
486 BMP and Shh. In fact, Dbx1 positive progenitors in the medial neural tube require little to no Shh or  
487 BMP signaling present in order to be specified (Pierani et al., 1999). In addition, recent experiments  
488 with precise control of Shh and BMP concentrations in an explant system have shown that cells choose  
489 either ventral or dorsal fates in the presence of significant BMP and Shh signaling (Zagorski et al.,  
490 2017). Regulation of *scube2* expression may be another way to enable crosstalk between signaling  
491 pathways, as *scube2* is not expressed in the dorsal most cells of the spinal cord, suggesting repression  
492 by dorsal factors. Specification of the dorsal boundary of *scube2* expression may encode yet more  
493 information about the size of the tissue which would then affect Shh spread.

494

495

## 496 **Methods**

### 497 **Generation of Transgenic Lines**

498 The construct used to make *tg(scube2:moxNG)* was generated by isothermal assembly of PCR-  
499 amplified *scube2* regulatory elements obtained from the CHORI-211 BAC library. Regulatory elements  
500 were in part chosen based on annotations of H3K4me1 and H3K4me3 binding (Aday et al., 2011).  
501 Selected regulatory sequences spanned 1677bp of upstream intergenic sequence and 5962bp of the  
502 area spanning exons 1-5 *scube2*. Regulatory sequences were cloned into a pMT backbone by placing  
503 a zebrafish codon-optimized moxNeonGreen fluorescent protein and sv40 poly-A tail just downstream  
504 of the endogenous *scube2* Kozak sequence (Costantini et al., 2015). The construct used to make  
505 *tg(scube2:scube2-moxNG)* was generated using the same regulatory sequences as

506 *tg(scube2:moxNG)*, with the addition of cDNA corresponding to exons 6-23 of the Scube2 coding  
507 sequence downstream of exon 5 and moxNeonGreen attached at the c-terminus with a 10 amino acid  
508 long GA rich linker. The construct used to make *tg(shh:mem-mCherry)* was derived from the previously  
509 reported *tg(shh:GFP)*, by replacement of GFP with mem-mCherry (Megason, 2009; Shkumatava et al.,  
510 2004).

511 Transgenic lines were generated by injecting plasmid DNA for each construct along with Tol2  
512 mRNA into wild type (AB) embryos at the single cell stage, as described previously (Kawakami, 2004).  
513 moxNeonGreen positive embryos were then selected for raising. Upon reaching sexual maturity, F0s  
514 were outcrossed and screened for founders. Founders were isolated and raised as single alleles.  
515 Monoallelic versions of each line are shown throughout the paper.

## 516 **Zebrafish Strains**

517 For wild type lines, AB fish were used. All fish were kept at 28°C on a 14-hour-light/10-hour-dark  
518 cycle. Embryos were collected from natural crosses. All fish-related procedures were carried out with  
519 the approval of Institutional Animal Care and Use Committee (IACUC) at Harvard University.

520 tgBAC(*ptch2:kaede*) (Huang et al., 2012; renamed from *ptch1* due to a change in zebrafish gene  
521 nomenclature), *tg(nkx2.2a:mGFP)* (Jessen et al., 1998), *tg(olig2:GFP)* (Shin et al., 2003),  
522 *tg(olig2:dsRed)* (Kucenas et al., 2008), and tgBAC(*dbx1b:GFP*) (Kinkhabwala et al., 2011) have been  
523 described previously.

## 524 **Size Reduction Technique.**

525 Size reduction was performed as described in our previous report (Ishimatsu et al., 2018). Embryo  
526 sizes were reduced by sequentially removing ~1/3 of the cells from the animal cap, then wounding the  
527 yolk. These surgeries are performed in 1/3 ringers solution, and embryos are immobilized in a thin layer  
528 of 2% methyl cellulose. Surgeries can be performed either with glass needles – as previously described

529 – or using a loop of thin stainless-steel wire that is inserted through a glass capillary tube and mounted  
530 on a halved chopstick as done here. Healthy uninjected embryos show a maximum success rate of  
531 ~60% while embryos which have undergone injection or were spawned by older females have  
532 significantly lower success rates. In each size reduction experiment, embryos are screened for health  
533 and the largest size reductions; those with insufficient size reduction or morphological defects are  
534 discarded.

### 535 **Construct Generation and Injections of mRNAs and Morpholinos**

536 Scube2-mCitrine was generated from cDNA obtained from the Talbot lab (Woods and Talbot, 2005).  
537 Fluorescent protein fusions were made by attaching mCitrine or moxNeonGreen with a 10 amino acid  
538 GA rich linker to the c-terminus of Scube2. Membrane-mTagBFP2 constructs were generated using  
539 membrane localization tags reported previously (Megason, 2009; Subach et al., 2011). These  
540 constructs were each sub-cloned into a pMTB backbone. mRNA for all experiments was synthesized  
541 from pCS or pMTB backbones via *in vitro* transcription using the mMACHINE system  
542 (Ambion). Embryos were injected at the single cell stage using a Nanoject system set to 2.3nl of  
543 injection volume containing 70-90pg of RNA for each mRNA injected. Injected embryos were then  
544 screened for brightness, and damaged embryos were removed. Scube2 morpholino injections were  
545 performed with 7ng of Scube2 MO2 and 3.5ng of p53 MO to control for phenotypic variability, while  
546 control morpholino injections were performed using 10.5ng of p53 MO only (Gerety and Wilkinson,  
547 2011; Woods and Talbot, 2005).

### 548 **Sonidegib and Cyclopamine Treatment**

549 Stock solution of 1 mM Sonidegib suspended in DMSO was used for treatment as generously given by  
550 the lab of Rosalind Segal. Embryos were placed in egg water containing a concentration of 50µM for  
551 the treatment condition, and equal parts DMSO were added to the sham control. Cyclopamine was

552 dissolved in 100% ethanol to make 50mM stock solution and was diluted for treatment in egg water to  
553 100  $\mu$ M. Treatment began at 7 hpf and continued until imaging at 22 hpf.

## 554 **Confocal Imaging**

555 For quantitative imaging, embryos were staged and mounted in our previously described dorsal mount  
556 (Kimmel et al., 1995; Megason, 2009; Xiong et al., 2013) in egg water with 0.01% tricaine (Western  
557 Chemical, Inc.). Embryos were manipulated for proper positioning with hair loops, before gently  
558 lowering the coverslip. Embryos were not depressed by the coverslip or impinged by the mold, enabling  
559 imaging of their normal proportions. Imaging was performed on embryos staged at 18-24 hpf, unless  
560 otherwise noted in corresponding figure legends. Live imaging was performed using a Zeiss 710  
561 confocal/2-photon microscope, Zen image acquisition software, and C-Apochromat 40X 1.2 NA  
562 objective. For fluorescent protein excitation, 405 nm (BFP), 488 nm (GFP/moxNeonGreen), 514 nm  
563 (mCitrine), 561 nm (mCherry/dsRed) and 594 nm (mCardinal) lasers were used. The imaging field was  
564 centered in each embryo on the somite 6/7 boundary for consistent positioning between images. For  
565 quantitative analysis, imaging datasets are only compared between sibling embryos imaged on the  
566 same day with the same settings. This approach aims to avoid clutch effects or variability in detector  
567 sensitivity and laser power that occur over time. Typical imaging settings with the 40x objective were as  
568 follows: image size of 1024x1024 pixels with .21 $\mu$ m per pixel and an interval of 1 $\mu$ m in the Z direction.  
569 For display purposes, images are rendered in cross sectional views (X-Z axis) which are then rotated  
570 for display, with image intensities for co-injection markers adjusted evenly within datasets for  
571 displayable brightness. FRAP, early stage embryo imaging and time-lapses were performed using a 1.0  
572 NA 20x objective. Brightfield and widefield fluorescence images of whole embryos were obtained using  
573 an Olympus MVX10 and a Leica MZ12.5 dissecting microscope.

574

## 575 **FRAP Experiments and Analysis**

576 Imaging for FRAP was performed using a 1.0 NA 20x objective at dome stage. Bleaching was  
577 performed for two minutes in a 100 $\mu$ m $\times$ 100 $\mu$ m area in the center of the frame with a 488nm Argon  
578 laser. Imaging was performed with a low laser power to reduce bleaching, and images were obtained at  
579 10 second intervals over five minutes to quantify recovery. FRAP data in the bleached region was then  
580 normalized to the minimum and maximum intensity for each respective time trace. Normalized recovery  
581 intensities were then fitted to the following exponential to determine the mobile fraction ( $A$ ) in MATLAB:  
582  $y = A(1 - e^{-\tau t})$  (Munjal et al., 2015). These fitted traces were also used to determine the point at which  
583 50% maximum recovery was reached in Figure 5G.

#### 584 **Image Analysis**

585 Images were analyzed using a custom MATLAB-based image analysis software that enables rapid  
586 segmentation of neural tube imaging data. Neural imaging data is segmented by the user sequentially  
587 from anterior to posterior. Over a set step size (usually 50 pixels), the user selects points at the base of  
588 the floor plate cell and top of the roof plate cell that divide the neural tube into its two halves (Fig. S1A).  
589 The user then selects the widest point of the neural tube in each image. Imaging data from mature  
590 neurons, found laterally, and within the lumen of the neural tube, found medially, are disregarded using  
591 a set percentage of neural width (Fig. S1B). Once these positions are recorded, imaging data is then  
592 recovered as average pixel intensity in 25 bins from ventral to dorsal across 3-4 somites of A-P length.  
593 This binning and averaging strategy enables comparison of data between embryos that accounts for  
594 variations in neural tube D-V height. During the segmentation process, the researcher is blinded to the  
595 title of the dataset which contains information about its treatment condition. For distribution plots,  
596 binned intensities are reported for each embryo as the average intensities for each bin along the entire  
597 AP axis of the imaging volume. Each embryo's average intensity profile is then treated as an  
598 independent sample and averaged for displayed distribution profiles and standard deviations. To avoid



599 artifacts caused by rounding in the calculations of half maximum control intensity positional values are  
600 extracted from the spline-interpolated intensity profiles for each individual dataset.

601 Progenitor domain segmentation is performed on average intensity profiles from each embryo in  
602 a dataset in the following manner: first, all intensity profiles in the data set undergo background  
603 subtraction and cross channel fluorescence caused by the extreme brightness of the *dbx1b:GFP* line is  
604 removed from the *olig2:dsred* channel. Intensity profiles are then fed to a peak finding algorithm to  
605 identify local maxima. Both *dbx1b+* and *nkx2.2a+* progenitor domains are found in the green channel,  
606 so a maximum of two peaks is allowed. In the red channel, only one peak is specified to identify  
607 *olig2:dsred* signal. Average peak intensity values for each domain are then calculated for the entire  
608 control dataset, and 50% of this value in the case of the *nkx2.2a* and *dbx1b* domains is used as the  
609 threshold for calculating domain width. Given its greater spread along the D-V axis, a threshold of 25%  
610 of peak height is used in calculating width of the *olig2+* domain. Domain widths are then extracted from  
611 spline-interpolated intensity profiles to avoid errors introduced by rounding to the next bin. Segmented  
612 widths and positions of *nkx2.2a*, *olig2*, and *dbx1b* expression are then averaged for plotting purposes.  
613 Domain plots are generated by assigning all *nkx2.2a+* progenitors to the p3 fate, *olig2+* progenitors  
614 lacking *nkx2.2a* expression overlap to the pMN fate, and *dbx1b+* progenitors to the p0-d6 fate. These  
615 domain sizes and positions are then used to reconstruct domains in-between or flanking them, which  
616 include the p2-p1 domain between pMN and p0-d6, the floorplate below p3, and the d5-roofplate above  
617 p0-d6. These heights and positions are then used to generate the stacked bar plots shown.

## 618 **Statistical Analysis**

619 Statistical comparisons of maximum average intensity and position of 50% maximum intensity  
620 are performed by an unpaired T-test. Although each dataset contains hundreds of measurements of  
621 each binned intensity value over the A-P axis of a z-stack, only the average of these measurements for  
622 each embryo is treated as a data-point for calculation of the standard deviation and statistical

623 significance tests. This is done to avoid oversampling that would exaggerate statistical significance. In  
624 all measurements, statistical significance is markedly increased if analysis is performed by treating all  
625 underlying intensity measurements as samples. Thresholds for calculating the position of half maximum  
626 are determined from the average maximum of the corresponding control dataset for each experiment.  
627 Position is then determined from the fitted trend-line to avoid inaccuracies due to rounding. To calculate  
628 the significance of shifts in boundary positions, upper domain boundaries for each embryo were  
629 compared in an un-paired t-test between embryos from each population. When the progenitor domain  
630 segmentation algorithm finds there is no domain present, the boundary is set to 0.

### 631 **CRISPR Screen for Scube2 Regulators**

632 Cas9 protein was generated and purified in lab as described (Gagnon et al., 2014). Three guide RNA  
633 sequences targeting the first one-to-three exons of each gene were selected based on their quality  
634 using the web-tool CHOP-CHOP and synthesized using standard methods (Gagnon et al., 2014).  
635 Equivalent guide RNA and Cas9 protein concentrations were used in all samples for mosaic knockout.  
636 Phenotypes were assessed at 18-20 hpf by confocal microscopy.

637

638

### 639 **Acknowledgments**

640 We thank Lisa Goodrich, Rosalind Segal, and Wolfram Goessling for their comments and helpful  
641 discussion. The Scube2 construct was a gift from the Talbot lab.

642

### 643 **Competing interest**

644 The authors declare no competing or financial interests.

645

### 646 **Funding**

647 Z.M.C was supported in part by the program in Biological and Biomedical Sciences at Harvard  
648 University. S.G.M. and Z.M.C. were supported by R01-GM107733 and R01-DC015478. T.Y.-C.T. was  
649 supported by the Damon Runyon Cancer Foundation Fellowship.  
650

651 **References**

- 652 **Aday, A. W., Zhu, L. J., Lakshmanan, A., Wang, J. and Lawson, N. D.** (2011). Identification  
653 of cis regulatory features in the embryonic zebrafish genome through large-scale profiling of  
654 H3K4me1 and H3K4me3 binding sites. *Dev. Biol.* **357**, 450–462.
- 655 **Averbukh I, Ben-Zvi D, Mishra S, Barkai N, Averbukh, I., Ben-Zvi, D., Mishra, S. and**  
656 **Barkai, N.** (2014). Scaling morphogen gradients during tissue growth by a cell division rule.  
657 *Development* **141**, 2150–6.
- 658 **Barkai, N. and Ben-Zvi, D.** (2009). “Big frog, small frog”--maintaining proportions in embryonic  
659 development: delivered on 2 July 2008 at the 33rd FEBS Congress in Athens, Greece. *FEBS J.*  
660 **276**, 1196–207.
- 661 **Ben-Zvi, D. and Barkai, N.** (2010). Scaling of morphogen gradients by an expansion-repression  
662 integral feedback control. *Proc. Natl. Acad. Sci. U. S. A.* **107**, 6924–9.
- 663 **Ben-Zvi, D., Shilo, B.-Z., Fainsod, A. and Barkai, N.** (2008). Scaling of the BMP activation  
664 gradient in *Xenopus* embryos. *Nature* **453**, 1205–11.
- 665 **Ben-Zvi, D., Pyrowolakis, G., Barkai, N. and Shilo, B.-Z.** (2011). Expansion-repression  
666 mechanism for scaling the Dpp activation gradient in *Drosophila* wing imaginal discs. *Curr. Biol.*  
667 **21**, 1391–6.
- 668 **Ben-Zvi, D., Fainsod, A., Shilo, B.-Z. and Barkai, N.** (2014). Scaling of dorsal-ventral  
669 patterning in the *Xenopus laevis* embryo. *Bioessays* **36**, 151–6.
- 670 **Bidet, M., Joubert, O., Lacombe, B., Ciantar, M., Nehmé, R., Mollat, P., Brétilon, L.,**  
671 **Faure, H., Bittman, R., Ruat, M., et al.** (2011). The Hedgehog Receptor Patched Is  
672 Involved in Cholesterol Transport. *PLoS One* **6**, e23834.
- 673 **Briscoe, J. and Small, S.** (2015). Morphogen rules: design principles of gradient-mediated embryo  
674 patterning. *Development* **142**, 3996–4009.
- 675 **Briscoe, J., Chen, Y., Jessell, T. M. and Struhl, G.** (2001). A hedgehog-insensitive form of  
676 patched provides evidence for direct long-range morphogen activity of sonic hedgehog in the  
677 neural tube. *Mol. Cell* **7**, 1279–91.
- 678 **Burke, R., Nellen, D., Bellotto, M., Hafen, E., Senti, K.-A. A., Dickson, B. J. and**  
679 **Basler, K.** (1999). Dispatched, a Novel Sterol-Sensing Domain Protein Dedicated to the Release  
680 of Cholesterol-Modified Hedgehog from Signaling Cells. *Cell* **99**, 803–815.
- 681 **Cao, Y., Ryser, M. D., Payne, S., Li, B., Rao, C. V. and You, L.** (2016). Collective Space-  
682 Sensing Coordinates Pattern Scaling in Engineered Bacteria. *Cell* **165**, 620–630.

- 683 **Chamberlain, C. E., Jeong, J., Guo, C., Allen, B. L. and McMahon, A. P.** (2008).  
684 Notochord-derived Shh concentrates in close association with the apically positioned basal body in  
685 neural target cells and forms a dynamic gradient during neural patterning. *Development* **135**,  
686 1097–106.
- 687 **Chen, M.-H., Li, Y.-J., Kawakami, T., Xu, S.-M. and Chuang, P.-T.** (2004). Palmitoylation is  
688 required for the production of a soluble multimeric Hedgehog protein complex and long-range  
689 signaling in vertebrates. *Genes Dev.* **18**, 641–59.
- 690 **Cooke, J.** (1981). Scale of body pattern adjusts to available cell number in amphibian embryos.  
691 *Nature* **290**, 775–778.
- 692 **Costantini, L. M., Balaban, M., Markwardt, M. L., Rizzo, M., Guo, F., Verkhusha, V. V.**  
693 **and Snapp, E. L.** (2015). A palette of fluorescent proteins optimized for diverse cellular  
694 environments. *Nat. Commun.* **6**, 7670.
- 695 **Creanga, A., Glenn, T. D., Mann, R. K., Saunders, A. M., Talbot, W. S. and Beachy, P.**  
696 **A.** (2012). Scube/You activity mediates release of dually lipid-modified Hedgehog signal in soluble  
697 form. *Genes Dev.* **26**, 1312–25.
- 698 **Driesch, H.** (1892). Entwicklungsmechanische Studien: I. Der Werthe der beiden ersten  
699 Furchungszellen in der Echinogdermenentwicklung. Experimentelle Erzeugung von Theil- und  
700 Doppelbildungen. *Zeitschrift für wissenschaftliche Zool.*
- 701 **Francois, P., Vonica, A., Brivanlou, A. H. and Siggia, E. D.** (2009). Scaling of BMP gradients  
702 in *Xenopus* embryos. *Nature* **461**, E1–E1.
- 703 **Gagnon, J. A., Valen, E., Thyme, S. B., Huang, P., Ahkmetova, L., Pauli, A., Montague,**  
704 **T. G., Zimmerman, S., Richter, C., Schier, A. F., et al.** (2014). Efficient Mutagenesis by  
705 Cas9 Protein-Mediated Oligonucleotide Insertion and Large-Scale Assessment of Single-Guide  
706 RNAs. *PLoS One* **9**, e98186.
- 707 **Gerety, S. S. and Wilkinson, D. G.** (2011). Morpholino artifacts provide pitfalls and reveal a novel  
708 role for pro-apoptotic genes in hindbrain boundary development. *Dev. Biol.* **350**, 279–89.
- 709 **Gribble, S. L., Nikolaus, O. B. and Dorsky, R. I.** (2007). Regulation and function of *Dbx* genes  
710 in the zebrafish spinal cord. *Dev. Dyn.* **236**, 3472–83.
- 711 **Grimmond, S., Larder, R., Van Hateren, N., Siggers, P., Morse, S., Hacker, T., Arkell,**  
712 **R. and Greenfield, A.** (2001). Expression of a novel mammalian epidermal growth factor-  
713 related gene during mouse neural development. *Mech. Dev.* **102**, 209–211.
- 714 **Hamaratoglu, F., de Lachapelle, A. M., Pyrowolakis, G., Bergmann, S. and Affolter, M.**  
715 (2011). Dpp signaling activity requires Pentagone to scale with tissue size in the growing  
716 *Drosophila* wing imaginal disc. *PLoS Biol.* **9**, e1001182.

- 717 **Hammerschmidt, M., Bitgood, M. J. and McMahon, A. P.** (1996). Protein kinase A is a  
718 common negative regulator of Hedgehog signaling in the vertebrate embryo. *Genes Dev.* **10**, 647–  
719 58.
- 720 **Hollway, G. E., Maule, J., Gautier, P., Evans, T. M., Keenan, D. G., Lohs, C., Fischer,**  
721 **D., Wicking, C. and Currie, P. D.** (2006). Scube2 mediates Hedgehog signalling in the  
722 zebrafish embryo. *Dev. Biol.* **294**, 104–18.
- 723 **Inomata, H., Shibata, T., Haraguchi, T. and Sasai, Y.** (2013). Scaling of dorsal-ventral  
724 patterning by embryo size-dependent degradation of Spemann’s organizer signals. *Cell* **153**,  
725 1296–311.
- 726 **Ishimatsu, K., Hiscock, T. W., Collins, Z. M., Sari, D. W. K., Lischer, K., Richmond, D.**  
727 **L., Bessho, Y., Matsui, T. and Megason, S. G.** (2018). Size-reduced embryos reveal a  
728 gradient scaling-based mechanism for zebrafish somite formation. *Development* **145**, dev161257.
- 729 **Jakobs, P., Exner, S., Schürmann, S., Pickhinke, U., Bandari, S., Ortmann, C., Kupich,**  
730 **S., Schulz, P., Hansen, U., Seidler, D. G., et al.** (2014). Scube2 enhances proteolytic Shh  
731 processing from the surface of Shh-producing cells. *J. Cell Sci.* **127**, 1726–37.
- 732 **Jakobs, P., Schulz, P., Ortmann, C., Schürmann, S., Exner, S., Rebolledo-Rios, R.,**  
733 **Dreier, R., Seidler, D. G. and Grobe, K.** (2016). Bridging the gap: heparan sulfate and  
734 Scube2 assemble Sonic hedgehog release complexes at the surface of producing cells. *Sci. Rep.*  
735 **6**, 26435.
- 736 **Jessen, J. R., Meng, A., McFarlane, R. J., Paw, B. H., Zon, L. I., Smith, G. R. and Lin,**  
737 **S.** (1998). Modification of bacterial artificial chromosomes through Chi-stimulated homologous  
738 recombination and its application in zebrafish transgenesis. *Proc. Natl. Acad. Sci.* **95**, 5121–5126.
- 739 **Kawakami, K.** (2004). Transgenesis and Gene Trap Methods in Zebrafish by Using the Tol2  
740 Transposable Element. pp. 201–222.
- 741 **Kawakami, T., Kawcak, T., Li, Y.-J., Zhang, W., Hu, Y. and Chuang, P.-T.** (2002). Mouse  
742 dispatched mutants fail to distribute hedgehog proteins and are defective in hedgehog signaling.  
743 *Development* **129**, 5753–65.
- 744 **Kawakami, A., Nojima, Y., Toyoda, A., Takahoko, M., Satoh, M., Tanaka, H., Wada, H.,**  
745 **Masai, I., Terasaki, H., Sakaki, Y., et al.** (2005). The zebrafish-secreted matrix protein  
746 you/scube2 is implicated in long-range regulation of hedgehog signaling. *Curr. Biol.* **15**, 480–8.
- 747 **Kicheva, A., Bollenbach, T., Ribeiro, A., Valle, H. P., Lovell-Badge, R., Episkopou, V.**  
748 **and Briscoe, J.** (2014). Coordination of progenitor specification and growth in mouse and chick  
749 spinal cord. *Science (80-. ).* **345**, 1254927–1254927.
- 750 **Kimmel, C. B., Ballard, W. W., Kimmel, S. R., Ullmann, B. and Schilling, T. F.** (1995).

- 751 Stages of embryonic development of the zebrafish. *Dev. Dyn.* **203**, 253–310.
- 752 **Kinkhabwala, A., Riley, M., Koyama, M., Monen, J., Satou, C., Kimura, Y., Higashijima,**  
753 **S.-I. and Fetcho, J.** (2011). A structural and functional ground plan for neurons in the hindbrain  
754 of zebrafish. *Proc. Natl. Acad. Sci. U. S. A.* **108**, 1164–9.
- 755 **Kucenas, S., Takada, N., Park, H.-C., Woodruff, E., Broadie, K. and Appel, B.** (2008).  
756 CNS-derived glia ensheath peripheral nerves and mediate motor root development. *Nat. Neurosci.*  
757 **11**, 143–151.
- 758 **Kwong, L., Bijlsma, M. F. and Roelink, H.** (2014). Shh-mediated degradation of Hhip allows cell  
759 autonomous and non-cell autonomous Shh signalling. *Nat. Commun.* **5**, 4849.
- 760 **Liem, K. F., Jessell, T. M. and Briscoe, J.** (2000). Regulation of the neural patterning activity of  
761 sonic hedgehog by secreted BMP inhibitors expressed by notochord and somites. *Development*  
762 **127**, 4855–4866.
- 763 **Liu, T.-L., Upadhyayula, S., Milkie, D. E., Singh, V., Wang, K., Swinburne, I. A.,**  
764 **Mosaliganti, K. R., Collins, Z. M., Hiscock, T. W., Shea, J., et al.** (2018). Observing  
765 the cell in its native state: Imaging subcellular dynamics in multicellular organisms. *Science* **360**,  
766 eaaq1392.
- 767 **McHale, P., Rappel, W.-J. and Levine, H.** (2006). Embryonic pattern scaling achieved by  
768 oppositely directed morphogen gradients. *Phys. Biol.* **3**, 107–120.
- 769 **Megason, S. G.** (2009). In toto imaging of embryogenesis with confocal time-lapse microscopy.  
770 *Methods Mol. Biol.* **546**, 317–32.
- 771 **Morgan, T. H.** (1895). Half embryos and whole embryos from one of the first two blastomeres. *Anat.*  
772 *Anz.* **10**, 623–638.
- 773 **Munjal, A., Philippe, J.-M., Munro, E. and Lecuit, T.** (2015). A self-organized biomechanical  
774 network drives shape changes during tissue morphogenesis. *Nature* **524**, 351–355.
- 775 **Pepinsky, R. B., Zeng, C., Wen, D., Rayhorn, P., Baker, D. P., Williams, K. P., Bixler,**  
776 **S. A., Ambrose, C. M., Garber, E. A., Miatkowski, K., et al.** (1998). Identification of a  
777 Palmitic Acid-modified Form of Human Sonic hedgehog. *J. Biol. Chem.* **273**, 14037–14045.
- 778 **Pierani, A., Brenner-Morton, S., Chiang, C. and Jessell, T. M.** (1999). A sonic hedgehog-  
779 independent, retinoid-activated pathway of neurogenesis in the ventral spinal cord. *Cell* **97**, 903–  
780 15.
- 781 **Porter, J. A., Ekker, S. C., Park, W.-J., von Kessler, D. P., Young, K. E., Chen, C.-H.,**  
782 **Ma, Y., Woods, A. S., Cotter, R. J., Koonin, E. V., et al.** (1996a). Hedgehog Patterning

- 783 Activity: Role of a Lipophilic Modification Mediated by the Carboxy-Terminal Autoprocessing  
784 Domain. *Cell* **86**, 21–34.
- 785 **Porter, J. A., Young, K. E. and Beachy, P. A.** (1996b). Cholesterol Modification of Hedgehog  
786 Signaling Proteins in Animal Development. *Science* (80-. ). **274**, 255–259.
- 787 **Roberts, B., Casillas, C., Alfaro, A. C., Jägers, C. and Roelink, H.** (2016). Patched1 and  
788 Patched2 inhibit Smoothed non-cell autonomously. *Elife* **5**,.
- 789 **Shilo, B.-Z. and Barkai, N.** (2017). Buffering Global Variability of Morphogen Gradients. *Dev. Cell*  
790 **40**, 429–438.
- 791 **Shin, J., Park, H.-C., Topczewska, J. M., Mawdsley, D. J. and Appel, B.** (2003). Neural  
792 cell fate analysis in zebrafish using olig2 BAC transgenics. *Methods Cell Sci.* **25**, 7–14.
- 793 **Shkumatava, A., Fischer, S., Müller, F., Strahle, U. and Neumann, C. J.** (2004). Sonic  
794 hedgehog, secreted by amacrine cells, acts as a short-range signal to direct differentiation and  
795 lamination in the zebrafish retina. *Development* **131**, 3849–58.
- 796 **Spemann, H.** (1938). *Embryonic Development and Induction*. Yale Univ.; New Haven:
- 797 **Subach, O. M., Cranfill, P. J., Davidson, M. W. and Verkhusha, V. V.** (2011). An Enhanced  
798 Monomeric Blue Fluorescent Protein with the High Chemical Stability of the Chromophore. *PLoS*  
799 *One* **6**, e28674.
- 800 **Tukachinsky, H., Kuzmickas, R. P. P., Jao, C. Y. Y., Liu, J. and Salic, A.** (2012).  
801 Dispatched and Scube Mediate the Efficient Secretion of the Cholesterol-Modified Hedgehog  
802 Ligand. *Cell Rep.* **2**, 308–320.
- 803 **Umulis, D. M. and Othmer, H. G.** (2013). Mechanisms of scaling in pattern formation.  
804 *Development* **140**, 4830–43.
- 805 **Uygun, A., Young, J., Huycke, T. R., Koska, M., Briscoe, J. and Tabin, C. J.** (2016).  
806 Scaling Pattern to Variations in Size during Development of the Vertebrate Neural Tube. *Dev. Cell*  
807 **37**, 127–135.
- 808 **van Eeden, F. J. J., Granato, M., Schach, U., Brand, M., Furutani-Seiki, M., Haffter, P.,**  
809 **Hammerschmidt, M., Heisenberg, C. P. P., Jiang, Y. J. J., Kane, D. A. A., et al.**  
810 (1996). Mutations affecting somite formation and patterning in the zebrafish, *Danio rerio*.  
811 *Development* **123**, 153–164.
- 812 **Willot, V., Mathieu, J., Lu, Y., Schmid, B., Sidi, S., Yan, Y.-L., Postlethwait, J. H.,**  
813 **Mullins, M., Rosa, F. and Peyri ras, N.** (2002). Cooperative Action of ADMP- and BMP-  
814 Mediated Pathways in Regulating Cell Fates in the Zebrafish Gastrula. *Dev. Biol.* **241**, 59–78.



- 815 **Wolpert, L.** (1969). Positional information and the spatial pattern of cellular differentiation. *J. Theor.*  
816 *Biol.* **25**, 1–47.
- 817 **Woods, I. G. and Talbot, W. S.** (2005). The you gene encodes an EGF-CUB protein essential for  
818 Hedgehog signaling in zebrafish. *PLoS Biol.* **3**, e66.
- 819 **Xiong, F., Tentner, A. R., Huang, P., Gelas, A., Mosaliganti, K. R., Souhait, L.,**  
820 **Rannou, N., Swinburne, I. a, Obholzer, N. D., Cowgill, P. D., et al.** (2013). Specified  
821 neural progenitors sort to form sharp domains after noisy Shh signaling. *Cell* **153**, 550–61.
- 822 **Xu, J., Srinivas, B. P., Tay, S. Y., Mak, A., Yu, X., Lee, S. G. P., Yang, H.,**  
823 **Govindarajan, K. R., Leong, B., Bourque, G., et al.** (2006). Genomewide expression  
824 profiling in the zebrafish embryo identifies target genes regulated by Hedgehog signaling during  
825 vertebrate development. *Genetics* **174**, 735–52.
- 826 **Yang, R.-B., Ng, C. K. D., Wasserman, S. M., Colman, S. D., Shenoy, S., Mehraban,**  
827 **F., Komuves, L. G., Tomlinson, J. E. and Topper, J. N.** (2002). Identification of a novel  
828 family of cell-surface proteins expressed in human vascular endothelium. *J. Biol. Chem.* **277**,  
829 46364–73.
- 830 **Zagorski, M., Tabata, Y., Brandenberg, N., Lutolf, M. P., Tkačik, G., Bollenbach, T.,**  
831 **Briscoe, J. and Kicheva, A.** (2017). Decoding of position in the developing neural tube from  
832 antiparallel morphogen gradients. *Science* **356**, 1379–1383.
- 833 **Zeng, X., Goetz, J. A., Suber, L. M., Scott, W. J., Schreiner, C. M. and Robbins, D. J.**  
834 (2001). A freely diffusible form of Sonic hedgehog mediates long-range signalling. *Nature* **411**,  
835 716–20.

836

837

838

839

840

841 **Supplemental Figures:**

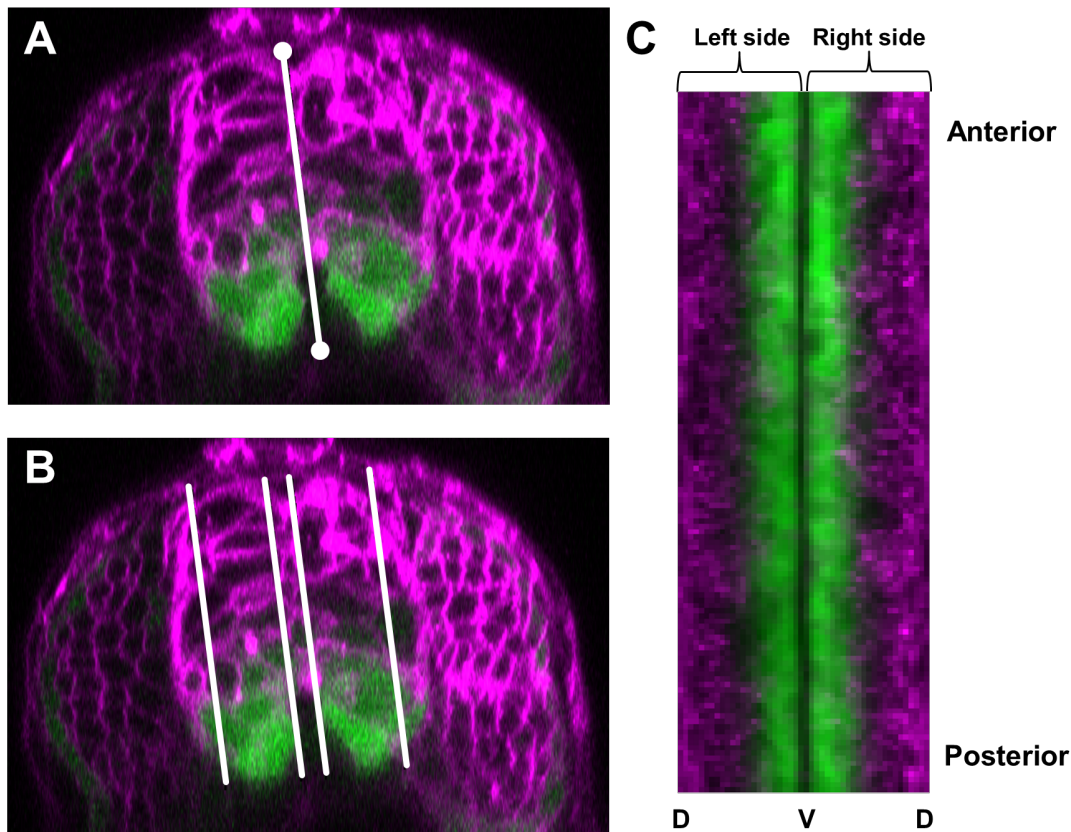

842

843 **Figure S1- Segmentation of neural imaging data.**

844 (A) Image of a 20 hpf *tg(ptch2:kaede)* reporter embryo undergoing selection of the “axis of reflection”  
845 which serves to mark a measurement of Dorsoventral height and separate the left and right halves of  
846 the neural tube. These positions are picked by the user, first by picking the bottom of the floor plate cell,  
847 then inputting the top coordinate of the roof plate cell. (B) Image of a 20 hpf *tg(ptch2:kaede)* reporter  
848 embryo after a user has selected the width of the spinal cord. The algorithm then calculates how much  
849 imaging data to collect based on a ratio which avoids mature neurons and the lumen of the spinal cord.  
850 (C) After collection of average intensities in each bin, data is stored as shown. Average profiles for  
851 generating distribution plots and segmenting domains are gathered by averaging these data along the  
852 A-P axis for both halves of the neural tube.

853

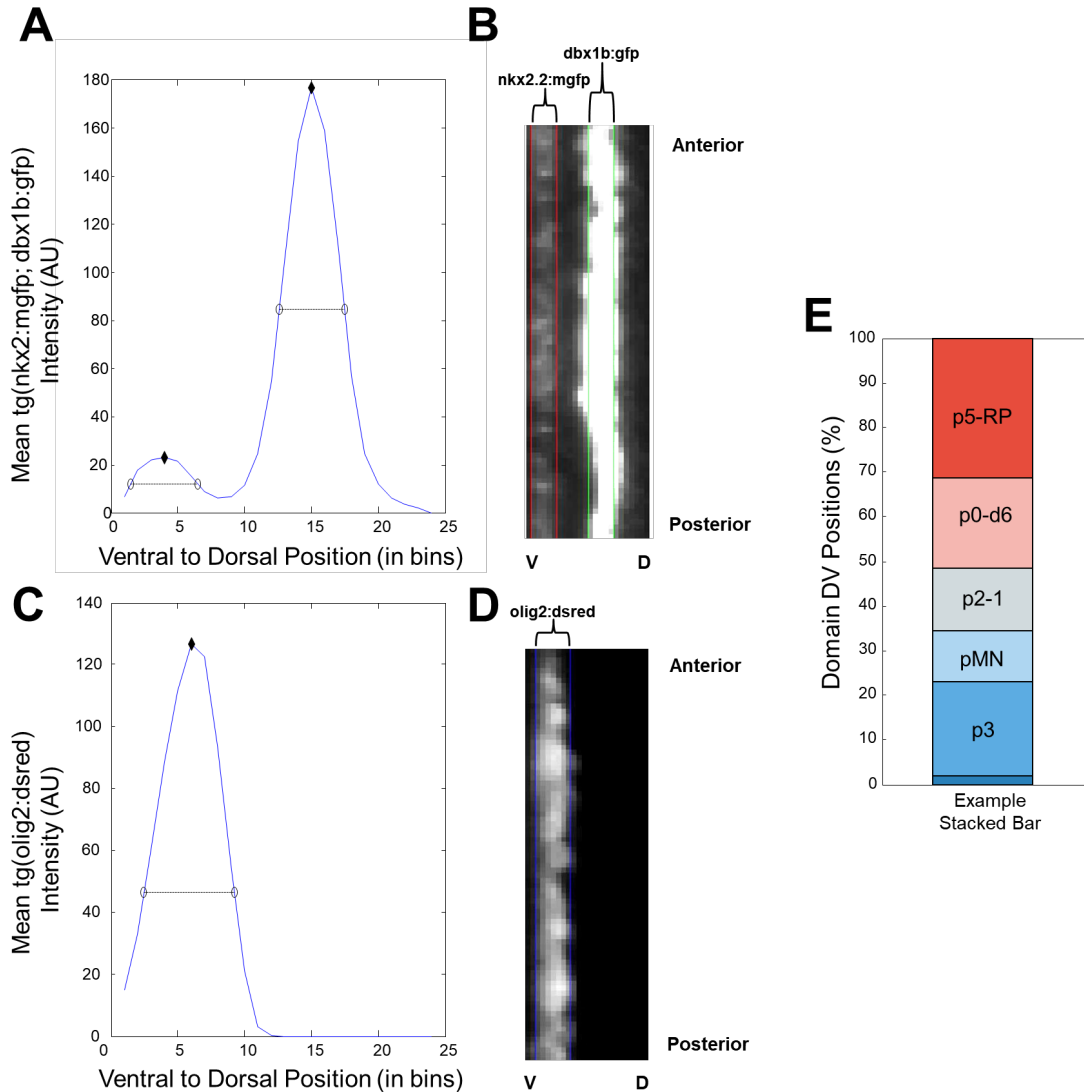

854

855 **Figure S2- Progenitor domain width determination and bar plot generation.**

856 (A) Averaged image intensity profiles from the green channel of both sides of a segmented neural tube  
 857 from a *tg(dbx1b:GFP; olig2:dsred; nkx2.2a:memGFP)* embryo. Black diamonds represent peaks found  
 858 by a peak finding algorithm, while open circles and lines show the calculated domain boundaries and  
 859 width for this embryo based on the universally applied threshold in this dataset. Thresholds are  
 860 determined by 50% of average peak intensity of the control population for each dataset. (B) Example  
 861 domain determination of *nkx2.2a* and *dbx1b+* cells. Red lines mark the predicted *nkx2.2a* domain,  
 862 which correlates with the boundary of their fluorescence. Green lines mark the predicted width of the

863 *dbx1b* domain which correlates well with visible fluorescence of this domain. Some anterior-posterior  
864 variability in domain size is observed. (C) Formatted as in part A, this plots the averages *olig2:dsred+*  
865 intensity, peak, and determined width. (D) Example domain determination of *olig2+* cells. Blue lines  
866 mark the predicted *olig2:dsred* domain, which correlates with the boundary of their fluorescence.  
867 Thresholds are determined by 25% of average peak intensity of the control embryos in each dataset.  
868 (E) Example stacked bar plot generated only from this embryo using calculated domain positions to  
869 determine domain sizes.  
870

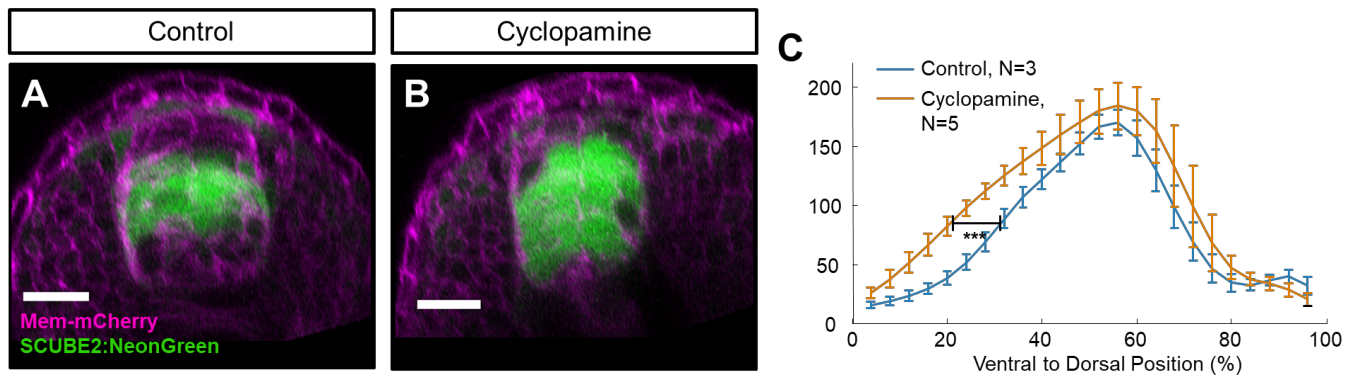

871

872

873 **Figure S3- Cyclopamine treatment of *tg(scube2:moxNG)* embryos.**

874 (A-C) Transverse view 22 hpf *tg(scube2:moxNG; mem:mCherry)* embryos treated with a DMSO control

875 (A) or 100µM Cyclopamine (B). (C) Quantification of mean reporter intensity of embryos as treated in A-

876 B. The black bar marks the position of 50% of control maximum intensity which was used for statistical

877 testing. These values were statistically significantly shifted ventrally in drug treated embryos relative to

878 control (unpaired t-test  $p = P = .0001145$ ).

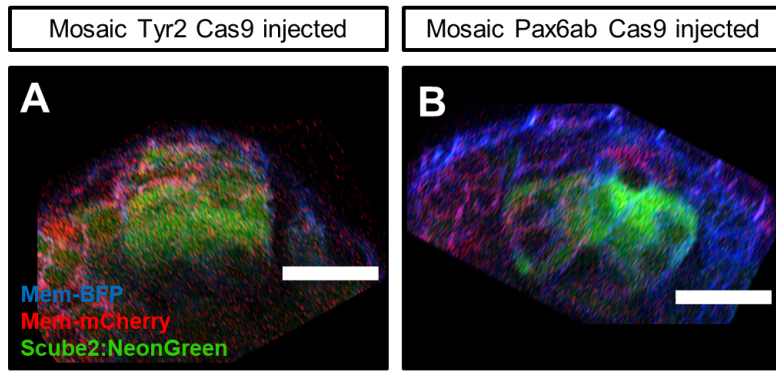

879

880

881 **Figure S4- Mosaic pax6a/b CRISPR mutants have lowered *scube2* expression.**

882 (A-B) *tg(scube2:moxNG)* embryos imaged at 18 hpf that were injected at the single cell stage with  
883 *mem-mTagBFP2* mRNA and injected at the 8-16 cell stage with *mem-mCherry* mRNA, Cas9 protein,  
884 and sgRNAs targeting either the tyrosinase pigment gene as a control (A) or *pax6a* and *b* (B).

885

886

887

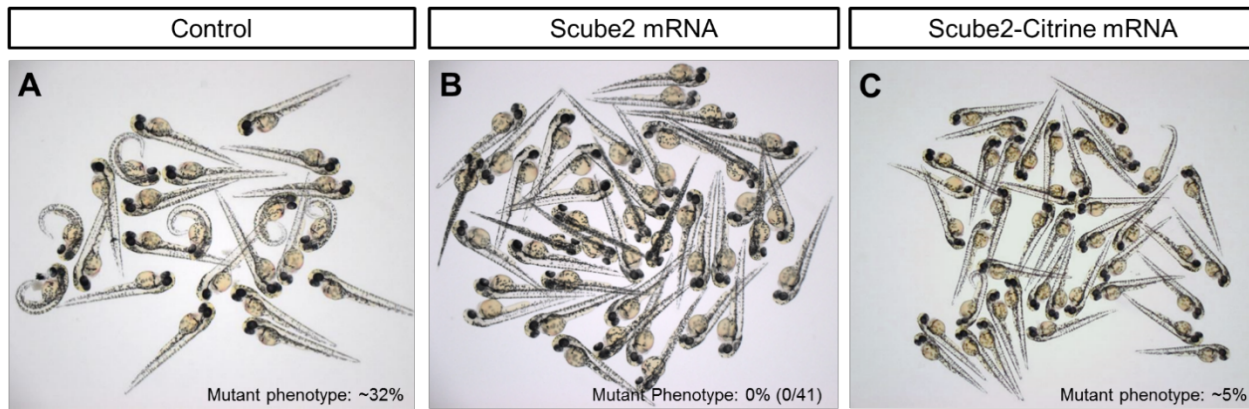

888

889 **Figure S5- Rescue of *scube2* CRISPR mutants with *scube2* or *scube2-mCitrine* mRNA.**

890 (A) Results of a *scube2* mutant in-cross. The allele was generated by mutagenesis with CRISPR using  
891 three guides targeting *scube2* coding sequence (B) Embryos rescued by the injection of *scube2* mRNA  
892 co-injected with *mem-mCardinal* which were screened for being *mem-mCardinal* positive (Liu et al.,  
893 2018). (C) Embryos rescued by the injection of *scube2-mCitrine* mRNA co-injected with *mem-*  
894 *mCardinal* which were also screened for *mem-mCardinal* fluorescence.

895

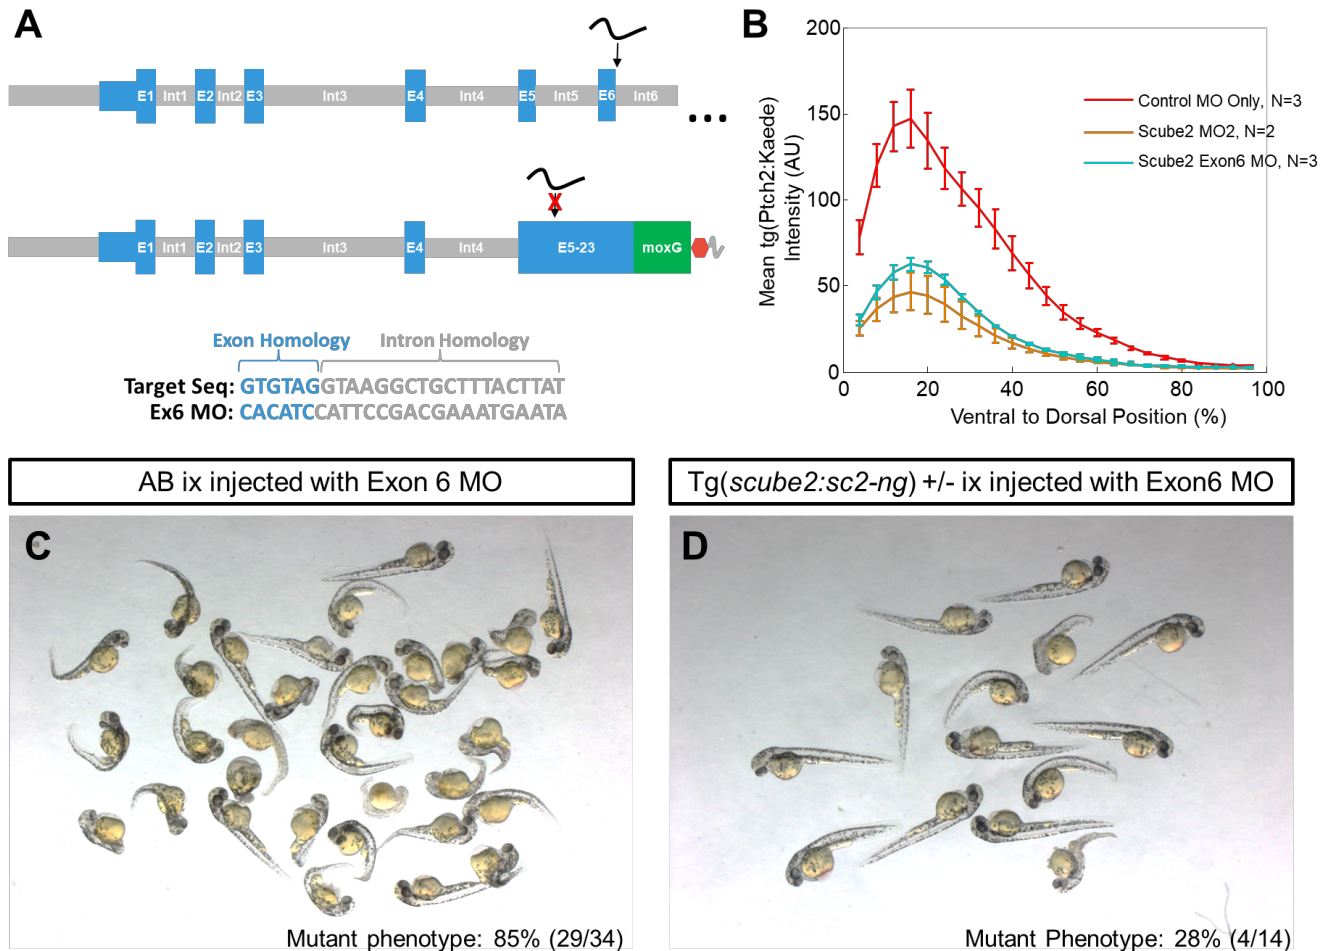

896

897 **Figure S6- Rescue of morpholino knockdown by *tg(scube2:scube2-moxNeonGreen)***  
 898 **expression.**

899 (A) Schematic of Scube2 Exon 6 targeting morpholino and expected resistance in the genome of  
 900 *tg(scube2:scube2-moxNeonGreen)* embryos. Splice junction targeted by the Exon 6 morpholino is  
 901 largely absent from the transgenic full length Scube2-mCitrine construct, allowing a test of rescue  
 902 capacity. (B) *tg(ptch2:kaede)* response profiles of embryos injected with p53 morpholino only,  
 903 the previously published Scube2 MO2 (Woods and Talbot, 2005), or Scube2 Exon 6 morpholino. (C)  
 904 Overview photo of wildtype embryos injected with Scube2 Exon6 morpholino showing the tail curling  
 905 indicative of Shh signaling phenotypes. (D) Overview photo of *tg(scube2:scube2-moxNeonGreen)*  
 906 embryos injected with Scube2 Exon6 morpholino.



907

908

909 **Supplemental Movies:**

910 **Movie S1- *tg(scube2:moxNG; shh:mem-mCherry)* timelapse transverse view**

911 **Movie S2- *tg(scube2:moxNG; shh:mem-mCherry)* timelapse maximum intensity projection**

912 **dorsal view**

913 **Movie S3- Scube2-mCitrine FRAP imaging in a dome stage embryo**

914 **Movie S4- Sec-mCitrine FRAP imaging in a dome stage embryo**

915 **Movie S5- *tg(scube2:scube2-moxNG; shh:mem-mCherry)* timelapse transverse view**

916 **Movie S6- *tg(scube2:scube2-moxNG; shh:mem-mCherry)* timelapse maximum intensity**

917 **projection dorsal view**

918
